# Supplementary material for: Thermally activated delayed fluorescent phenothiazine–dibenzo[a,j]phenazine–phenothiazine triads exhibiting tricolor-changing mechanochromic luminescence
Source: PubMed Central journal article supplement (PMC5433494; doi:10.1039/c6sc04863c), 2017-01-11
Supplement: SC-008-C6SC04863C-s001.pdf [file SC-008-C6SC04863C-s001.pdf]

*Electronic Supplementary Information (ESI) for*

**Thermally Activated Delayed Fluorescent  
Phenothiazine-Dibenzo[*a,j*]phenazine-Phenothiazine Triads Exhibiting  
Tricolor-Changing Mechanochromic Luminescence**

Masato Okazaki,<sup>†</sup> Youhei Takeda,<sup>\*,†</sup> Przemyslaw Data,<sup>\*,‡,§</sup> Piotr Pander,<sup>‡,§</sup> Heather Higginbotham,<sup>‡</sup>  
Andrew P. Monkman,<sup>‡</sup> and Satoshi Minakata<sup>\*,†</sup>

<sup>†</sup>*Department of Applied Chemistry, Graduate School of Engineering, Osaka University, Yamadaoka  
2-1, Suita, Osaka 565-0871, Japan*

<sup>‡</sup>*Physics Department, Durham University, South Road, Durham DH1 3LE, United Kingdom*

<sup>§</sup>*Faculty of Chemistry, Silesian University of Technology, M. Strzody 9, 44-100 Gliwice, Poland*

E-mail: [takeda@chem.eng.osaka-u.ac.jp](mailto:takeda@chem.eng.osaka-u.ac.jp); [przemyslaw.data@durham.ac.uk](mailto:przemyslaw.data@durham.ac.uk);  
[minakata@chem.eng.osaka-u.ac.jp](mailto:minakata@chem.eng.osaka-u.ac.jp)

**Table of Contents**

|                                                    |         |
|----------------------------------------------------|---------|
| General Remarks                                    |         |
| Materials                                          | S2      |
| Synthetic Procedures and Spectroscopic Data of 1–4 | S2–S3   |
| Mechanochromic Luminescence Properties             | S3–S6   |
| Acid-induced Emission Quenching                    | S7–S8   |
| Powder X-Ray Diffraction (PXRD) Analysis           | S9      |
| Differential Scanning Calorimetry (DSC) Analysis   | S10     |
| Single Crystal X-ray Crystallographic Data         | S10–S11 |
| UV-vis Absorption and Emission Spectra             | S12–S13 |
| Concentration Effect on Emission Properties        | S14     |
| Diffuse Reflection Spectra                         | S15     |
| Theoretical Calculations                           | S15     |
| Time-resolved Photoluminescence Properties         | S16–S32 |
| Thermogravimetric Analysis (TGA)                   | S33–39  |
| Cyclic Voltammograms (CV)                          | S40–S42 |
| NMR Charts                                         | S43     |
| References                                         | S44–S47 |
|                                                    | S48     |

**General Remarks.** All reactions were carried out under an atmosphere of nitrogen unless otherwise noted. Melting points were determined on a Stanford Research Systems MPA100 OptiMelt Automated Melting Point System.  $^1\text{H}$  and  $^{13}\text{C}$  NMR spectra were recorded on a JEOL JMTC-400/54/SS spectrometer ( $^1\text{H}$  NMR, 400 MHz;  $^{13}\text{C}$  NMR, 100 MHz) using tetramethylsilane as an internal standard. Infrared spectra were acquired on a SHIMADZU IRAffinity-1 FT-IR Spectrometer. Mass spectra were obtained on a JEOL JMS-DX303HF mass spectrometer. High-resolution mass spectra (HRMS) were obtained on a JEOL JMS-DX303HF mass spectrometer. UV-vis spectra were recorded on a Shimadzu UV-2550 spectrophotometer. Emission spectra were recorded on a HAMAMATSU C11347-01 spectrometer with an integrating sphere. Differential scanning calorimetry (DSC) measurements were carried out on a DSC 6220 (SII) system at a scanning rate of  $10\text{ }^\circ\text{C min}^{-1}$  under a  $\text{N}_2$  atmosphere. Powder X-ray diffraction (XRD) patterns were recorded by Rigaku SmartLab X-ray diffractometer with  $\text{CuK}\alpha$  radiation ( $\lambda = 1.5418\text{ \AA}$ ). Diffuse reflection spectra were collected by a JASCO V-670 UV-Vis-NIR Spectrophotometer. Cyclic voltammetry (CV) was performed with ALS-600 (BAS Inc.) system. Thermogravimetric analysis (TGA) was performed with TG/DTA-7200 (SII) system. Products were purified by chromatography on silica gel BW-300 and Chromatorex NH (Fuji Silysia Chemical Ltd.). Analytical thin-layer chromatography (TLC) was performed on pre-coated silica gel glass plates (Merck silica gel 60 F254 and Fuji Silysia Chromatorex NH, 0.25 mm thickness). Compounds were visualized with UV lamp. Small molecules and cathode layers were thermally evaporated using Kurt J. Lesker Spectros II Deposition at  $10^{-6}$  mbar. All organic materials and aluminum were deposited at a rate of  $1\text{ \AA s}^{-1}$ , and the LiF layer was deposited at  $0.1\text{ \AA s}^{-1}$ . Investigation of the characteristic of OLED devices was conducted in 10 inches integrating sphere (Labsphere) connected to a SourceMeter unit. Phosphorescence (PH), prompt fluorescence (PF), and delayed fluorescence (DF) spectra and decays were recorded using nanosecond gated luminescence and lifetime measurements (from 400 ps to 1 s) using either a high energy pulsed Nd:YAG laser emitting at 355 nm (EKSPLA) or a  $\text{N}_2$  laser emitting at 337 nm. Emission was focused onto a spectrograph and detected on a sensitive gated iCCD camera (Stanford Computer Optics) having sub-nanosecond resolution. PF/DF time resolved measurements were performed by exponentially increasing gate and delay times.

**Materials.** 6,6'-Dibromo-1,1'-binaphthalene-2,2'-diamine (**S1**) [CAS No. 861890-12-2] was prepared from 6-Bromo-2-naphthol [CAS No. 15231-91-1] according to the procedures in literature.<sup>S1</sup> 6-Bromo-2-naphthol was prepared according to the procedures in literature.<sup>S2</sup> 3,7-di-*tert*-butyl-10*H*-phenothiazine [CAS No. 27075-55-4]<sup>S3</sup> and 9,9-dimethyl-9,10-dihydroacridine [CAS No. 6267-02-3]<sup>S4</sup> were prepared according to the procedures in literature. Tetrabutylammonium hexafluorophosphate for electrochemical measurement was purchased from TCI and used after repeated (3 times) recrystallization from EtOH. Commercial reagents were purchased from Sigma-Aldrich, TCI, or Wako Pure Chemical Industries, Ltd. and used as received. MeOH was dried over activated molecular sieves  $3\text{ \AA}$ . Toluene was purchased as

dehydrated grade and purified by passing through a solvent purification system (KOREA KIYON Co., Ltd.). Solvents of fluorescence spectroscopic grade were purchased from Nacalai Tesque Inc. and Kanto Chemical Co., Inc. for measurement of UV-vis and emission spectra. All organic evaporated compounds were purified by Creaphys organic sublimation system, and the following compounds were purchased from companies: CBP [4,4'-bis(*N*-carbazolyl)-1,1'-biphenyl] (Sigma Aldrich), NPB [*N,N'*-Di-1-naphthyl-*N,N'*-diphenylbenzidine] (TCI-Europe), TPBi [2,2',2''-(1,3,5-Benzinetriyl)-tris(1-phenyl-1-*H*-benzimidazole)] (LUMTEC), LiF (99.995%, Sigma Aldrich), and Aluminium wire (99.9995%, Alfa Aesar). OLED devices were fabricated using pre-cleaned indium-tin-oxide (ITO) coated glass substrates purchased from Ossila with a sheet resistance of 20  $\Omega/\text{cm}^2$  and ITO thickness of 100 nm. The formed OLED devices had a pixel size of 2 mm by 1.5 mm.

### Synthetic Procedures and Spectroscopic Data of 1–4.

#### *Preparation of 3,11-Dibromodibenzo[*a,j*]phenazine.*

3,11-Dibromodibenzo[*a,j*]phenazine (**S2**) was prepared through a slightly modified method developed by our group<sup>S5</sup> as follows (Eq S1): To a two-necked round-bottomed flask (300 mL) equipped with a three-way stopcock and a magnetic stir bar, was added 6,6'-dibromo-1,1'-binaphthalene-2,2'-diamine (**S1**) (442.1 mg, 1.0 mmol) under the air. The vessel was capped with a rubber septum, evacuated, and refilled with  $\text{N}_2$  gas for 3 times, and then MeOH (100 mL) was added through the septum. To this stirred mixture, was added 1,3-diiodo-5,5-dimethylhydantoin (DIH) (3.04 g, 8.0 mmol) under a stream of  $\text{N}_2$  gas at room temperature. The resulting solution was stirred for 3 h before quenched with aqueous  $\text{Na}_2\text{S}_2\text{O}_3$  (1.0 M, 100 mL), and the resulting mixture was extracted with  $\text{CH}_2\text{Cl}_2$  (100 mL  $\times$  3). The combined organic extracts were dried over  $\text{Na}_2\text{SO}_4$  and concentrated under vacuum to give the crude product, which was purified by flash column chromatography (eluent: hexane/EtOAc 95:5–9:1) on silica gel to give product **S2** (219.0 mg, 50%). Further purification was carried out by recrystallization from  $\text{CHCl}_3$ . The spectroscopic data were identical with those reported in literature.<sup>S5</sup>

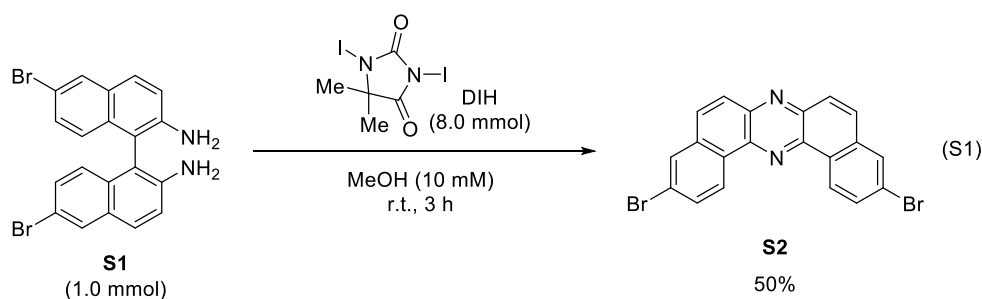

### Typical Procedures for the Synthesis of 3,11-Diaminodibenzo[*a,j*]phenazines

3,11-Diaminodibenzo[*a,j*]phenazines **1–4** were prepared through a slightly modified Pd-catalyzed amination reaction<sup>S6</sup> of **S2** with aromatic amines as follows (*Methods A, B or B'*).

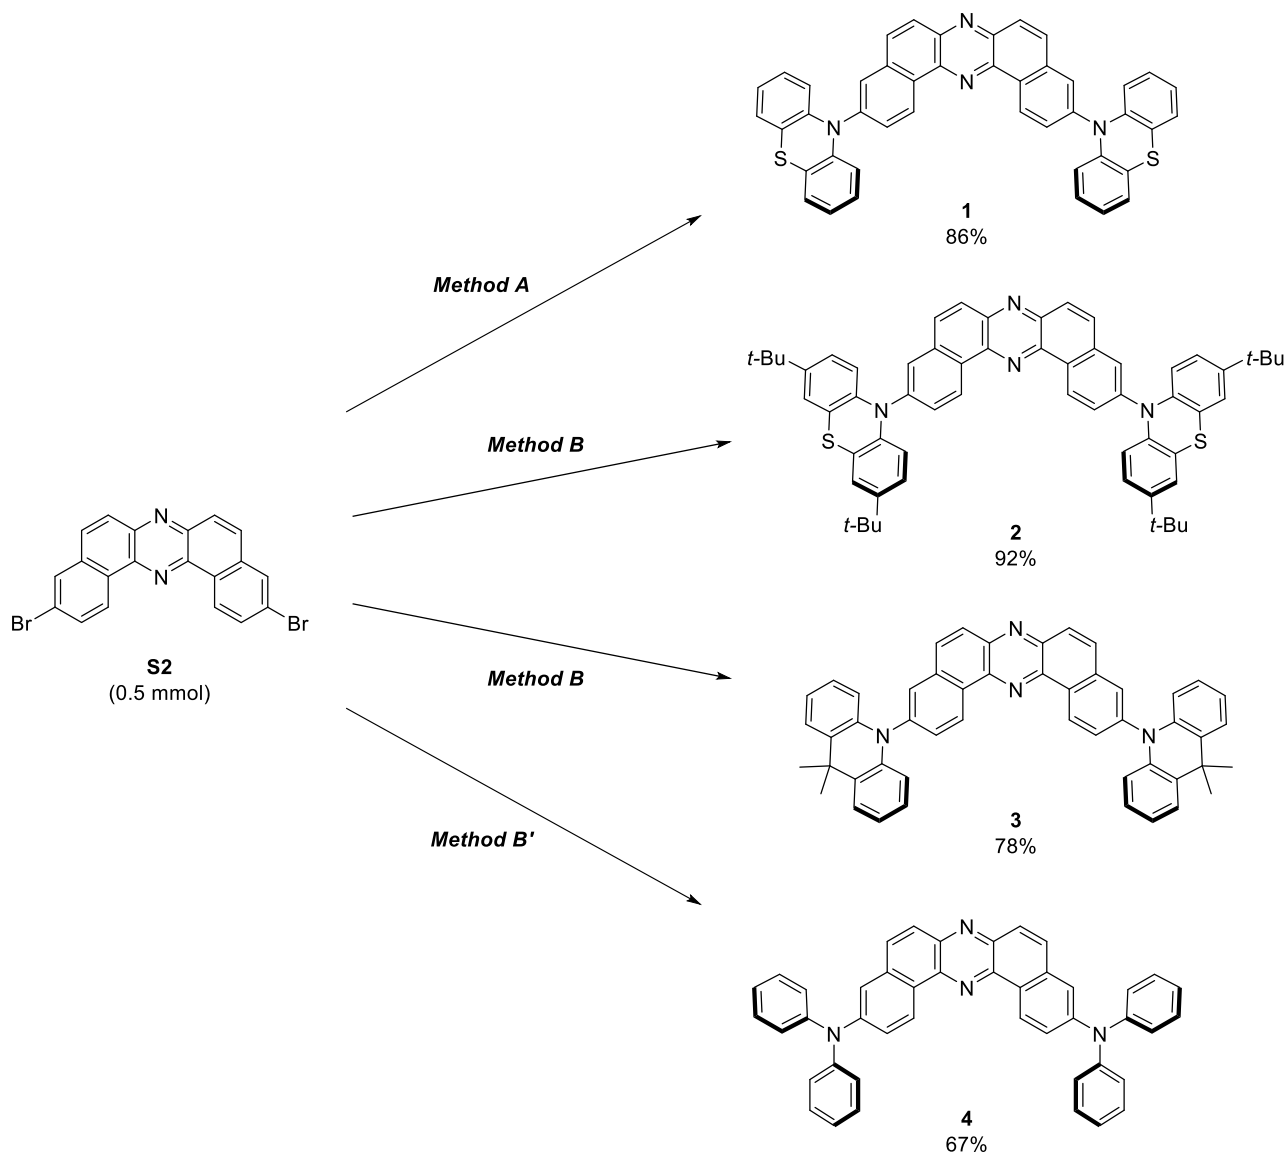

**Method A:** amine (2.2 equiv), Pd[P(*t*-Bu)<sub>3</sub>]<sub>2</sub> (5 mol%), K<sub>2</sub>CO<sub>3</sub> (6.0 equiv), toluene, reflux, 24 h  
**Method B:** amine (2.2 equiv), Pd[P(*t*-Bu)<sub>3</sub>]<sub>2</sub> (5 mol%), *t*-BuONa (2.4 equiv), toluene, reflux, 24 h  
**Method B':** amine (2.2 equiv), Pd[P(*t*-Bu)<sub>3</sub>]<sub>2</sub> (5 mol%), *t*-BuONa (2.4 equiv), toluene, reflux, 20 h

**Method A:** Toluene was degassed through freeze-pump-thaw cycling for 3 times before used. In a glovebox, to a two-necked reaction tube (10 mL) equipped with a three-way stopcock and a magnetic stir bar, was added Pd[P(*t*-Bu)<sub>3</sub>]<sub>2</sub> (12.8 mg, 5 mol%), and the tube was closed with a rubber septum. Outside the glovebox, dibromophenazine **S2** (219.0 mg, 0.50 mmol), 10*H*-phenothiazine (219.1 mg, 1.10 mmol), K<sub>2</sub>CO<sub>3</sub> (414.5 mg, 3.0 mmol), and toluene (5 mL) were added under a stream of N<sub>2</sub> gas at room temperature, and the resulting mixture was stirred under reflux for 24 h. Water (5 mL) was



added to the reaction mixture, and the organic layer was extracted with CH<sub>2</sub>Cl<sub>2</sub> (20 mL × 3). The combined organic extracts were dried over Na<sub>2</sub>SO<sub>4</sub>, and the solvent was evaporated in vacuo to give the crude product, which was purified by flash column chromatography (for the detailed purification methods, see the product data).

### **3,11-Di(10*H*-phenothiazin-10-yl)dibenzo[*a,j*]phenazine (1)**

Purified by flash column chromatography on NH silica gel (eluent: *n*-hexane/CH<sub>2</sub>Cl<sub>2</sub> 95:5–8:2) followed by recrystallization from a two-phase solvent of *n*-hexane/CHCl<sub>3</sub> (3:1); Yellow solid (290.2 mg, 86%); mp 300 °C (dec.); *R*<sub>f</sub> 0.18 (*n*-hexane/CH<sub>2</sub>Cl<sub>2</sub> 8:2, NH silica); <sup>1</sup>H NMR (400 MHz, CDCl<sub>3</sub>): δ 6.56 (dd, *J* = 1.6, 7.6 Hz, 4H), 6.92–7.00 (m, 8H), 7.18 (dd, *J* = 2.0, 7.2 Hz, 4H), 7.85 (dd, *J* = 2.0, 8.4 Hz, 2H), 7.97 (d, *J* = 2.0 Hz, 2H), 8.09 (d, *J* = 9.2 Hz, 2H), 8.14 (d, *J* = 9.2 Hz, 2H), 9.77 (d, *J* = 8.4 Hz, 2H); <sup>13</sup>C NMR (100 MHz, CDCl<sub>3</sub>): δ 118.3, 123.1, 123.4, 126.5, 127.0, 127.3, 127.7, 127.8, 129.7, 132.1, 135.3, 140.5, 142.8, 143.0, 143.7 (One carbon was not detected, probably due to the overlap of the signal with other aromatic peaks); IR (ATR): ν 3039, 1583, 1462, 1352, 1300, 1257, 1145, 850, 754, 740 cm<sup>-1</sup>; MS (FAB): *m/z* (relative intensity, %) 675 ([M + H]<sup>+</sup>, 6), 674 (M<sup>+</sup>, 7); HRMS (FAB): *m/z* calcd for C<sub>44</sub>H<sub>26</sub>N<sub>4</sub>S<sub>2</sub> (M<sup>+</sup>) 674.1599, found 674.1595.

**Method B and B'**: Toluene was degassed through freeze-pump-thaw cycling for 3 times before used. In a glovebox, to a two-necked reaction tube (10 mL) equipped with a three-way stopcock and a magnetic stir bar, were added Pd[P(*t*-Bu)<sub>3</sub>]<sub>2</sub> (12.8 mg, 5 mol%) and sodium *tert*-butoxide (115.3 mg, 1.20 mmol), and the tube was closed with a rubber septum. Outside the glovebox, dibromophenazine **S2** (219.0 mg, 0.50 mmol), amine [3,7-di-*tert*-butyl-10*H*-phenothiazine (342.6 mg), 9,9-dimethyl-9,10-dihydroacridine (230.2 mg), or diphenylamine (186.1 mg)] (1.10 mmol) and toluene (5 mL) were added under a stream of N<sub>2</sub> gas at room temperature, and the resulting mixture was stirred under reflux for 24 h (**Method B**) or 20 h (**Method B'**). Water (5 mL) was added to the reaction mixture, and the organic layer was extracted with CH<sub>2</sub>Cl<sub>2</sub> (20 mL × 3). The combined organic extracts were dried over Na<sub>2</sub>SO<sub>4</sub>, and the solvent was evaporated in vacuo to give the crude product, which was purified by flash column chromatography (for the detailed purification methods, see each product data).

### **3,11-Bis(3,7-di-*tert*-butyl-10*H*-phenothiazin-10-yl)dibenzo[*a,j*]phenazine (2)**

Purified by flash column chromatography on NH silica gel (eluent: *n*-hexane/CH<sub>2</sub>Cl<sub>2</sub> 95:5–9:1) followed by recrystallization from a two-phase solvent of *n*-hexane/CHCl<sub>3</sub> (20:1); Yellow solid (413.7 mg, 92%); mp 263 °C; *R*<sub>f</sub> 0.20 (*n*-hexane/CH<sub>2</sub>Cl<sub>2</sub> 8:2, NH silica); <sup>1</sup>H NMR (400 MHz, CDCl<sub>3</sub>): δ 1.28 (s, 36H), 6.61 (d, *J* = 8.8 Hz, 4H), 7.02 (dd, *J* = 2.0, 8.8 Hz, 4H), 7.24 (d, *J* = 2.0 Hz, 4H), 7.80 (dd, *J* = 2.0, 8.4 Hz, 2H), 7.89 (d, *J* = 2.0 Hz, 2H), 8.04 (d, *J* = 9.2 Hz, 2H), 8.10 (d, *J* = 9.2 Hz, 2H), 9.70 (d, *J* = 8.4 Hz, 2H); <sup>13</sup>C NMR (100 MHz, CDCl<sub>3</sub>): δ 31.3, 34.2, 118.8, 123.9, 123.9, 124.5, 124.7, 126.5, 127.5, 127.7, 129.0, 132.1, 135.2, 140.6, 141.1, 142.6, 143.7, 146.8; IR (ATR):

$\nu$  2953, 1595, 1475, 1357, 1305, 1263, 1143, 856, 808, 721  $\text{cm}^{-1}$ ; MS (FAB):  $m/z$  (relative intensity, %) 899 ( $[\text{M} + \text{H}]^+$ , 100), 898 ( $\text{M}^+$ , 96); HRMS (FAB):  $m/z$  calcd for  $\text{C}_{60}\text{H}_{58}\text{N}_4\text{S}_2$  ( $\text{M}^+$ ) 898.4103, found 898.4096.

### **3,11-Bis(9,9-dimethylacridin-10(9H)-yl)dibenzo[*a,j*]phenazine (3)**

Purified by flash column chromatography on NH silica gel (eluent: *n*-hexane/ $\text{CH}_2\text{Cl}_2$  95:5–9:1) followed by recrystallization from a two-phase solvent of *n*-hexane/ $\text{CHCl}_3$  (5:1); Yellow solid (271.0 mg, 78%); mp 315 °C (dec.);  $R_f$  0.33 (*n*-hexane/ $\text{CH}_2\text{Cl}_2$  8:2, NH silica);  $^1\text{H}$  NMR (400 MHz,  $\text{CDCl}_3$ ):  $\delta$  1.78 (s, 12H), 6.35–6.37 (m, 4H), 6.97–6.99 (m, 8H), 7.52–7.54 (m, 4H), 7.86 (dd,  $J = 2.0$ , 8.4 Hz, 2H), 8.05 (d,  $J = 2.0$  Hz, 2H), 8.16 (d,  $J = 9.6$  Hz, 2H), 8.21 (d,  $J = 9.6$  Hz, 2H), 9.92 (d,  $J = 8.4$  Hz, 2H);  $^{13}\text{C}$  NMR (100 MHz,  $\text{CDCl}_3$ ):  $\delta$  31.4, 36.1, 114.2, 120.9, 125.4, 126.4, 127.8, 128.3, 130.2, 130.6, 130.9, 130.9, 132.3, 135.5, 140.5, 140.9, 142.4, 143.2; IR (ATR):  $\nu$  3035, 2958, 1591, 1473, 1444, 1330, 1271, 931, 856, 796, 740  $\text{cm}^{-1}$ ; MS (EI):  $m/z$  (relative intensity, %) 694 ( $\text{M}^+$ , 12), 679 ( $[\text{M}-\text{Me}]^+$ , 100), 471 ( $[\text{C}_{34}\text{H}_{21}\text{N}_3]^+$ , 44), 332 ( $[\text{C}_{24}\text{H}_{16}\text{N}_2]^+$ , 81); HRMS (EI):  $m/z$  calcd for  $\text{C}_{50}\text{H}_{38}\text{N}_4$  ( $\text{M}^+$ ) 694.3096, found 694.3099.

### **3,11-Bis(diphenylamino)dibenzo[*a,j*]phenazine (4)**

Purified by flash column chromatography on NH silica gel (eluent: *n*-hexane/EtOAc 99:1–98:2) followed by recrystallization from a two-phase solvent of *n*-hexane/ $\text{CHCl}_3$  (5:1); Orange solid (205.9 mg, 67%); mp 296 °C (dec.);  $R_f$  0.25 (*n*-hexane/EtOAc 8:2, NH silica);  $^1\text{H}$  NMR (400 MHz,  $\text{CDCl}_3$ ):  $\delta$  7.13 (t,  $J = 7.2$  Hz, 4H), 7.23 (d,  $J = 7.6$  Hz, 8H), 7.34 (dd,  $J = 7.2$ , 7.6 Hz, 8H), 7.51 (d,  $J = 2.4$  Hz, 2H), 7.55 (dd,  $J = 2.4$ , 8.8 Hz, 2H), 7.80 (d,  $J = 8.8$  Hz, 2H), 7.94 (d,  $J = 8.8$  Hz, 2H), 9.36 (d,  $J = 8.8$  Hz, 2H);  $^{13}\text{C}$  NMR (100 MHz,  $\text{CDCl}_3$ ):  $\delta$  119.6, 123.2, 123.8, 125.2, 125.8, 126.2, 127.4, 129.5, 131.5, 134.6, 140.9, 141.7, 147.4, 149.0; IR (ATR):  $\nu$  3030, 1590, 1476, 1358, 1275, 1141, 870, 848, 790, 750  $\text{cm}^{-1}$ ; MS (EI):  $m/z$  (relative intensity, %) 614 ( $\text{M}^+$ , 100), 307 ( $[\text{C}_{22}\text{H}_{15}\text{N}_2]^+$ , 26); HRMS (EI):  $m/z$  calcd for  $\text{C}_{44}\text{H}_{30}\text{N}_4$  ( $\text{M}^+$ ) 614.2470, found 614.2469.

## Mechanochromic Luminescence (MCL) Properties

**Table S1.** Summary of MCL properties of **1–4** and POZ-DBPHZ.

| Sample | $\lambda_{\text{ex}}$ (nm) | $\lambda_{\text{em}}$ (nm) | $\Phi_{\text{FL}}$ | Sample      | $\lambda_{\text{ex}}$ (nm) | $\lambda_{\text{em}}$ (nm) | $\Phi_{\text{FL}}$ |
|--------|----------------------------|----------------------------|--------------------|-------------|----------------------------|----------------------------|--------------------|
| 1_Y    | 300                        | 568                        | 0.16               | 3_Y1        | 300                        | 592                        | 0.17               |
| 1_O    | 400                        | 640                        | 0.08               | 3_Y2        | 300                        | 577                        | 0.15               |
| 1_R    | 400                        | 673                        | 0.12               | 3_Y3        | 300                        | 562                        | 0.10               |
| 1_O2   | 400                        | 646                        | 0.11               | 3_Y4        | 300                        | 559                        | 0.08               |
| 1_YO   | 400                        | 596                        | 0.05               | 4_O1        | 300                        | 594                        | 0.07               |
| 2_YG   | 300                        | 547                        | 0.13               | 4_O2        | 300                        | 597                        | 0.20               |
| 2_R    | 300                        | 663                        | 0.15               | 4_O3        | 300                        | 600                        | 0.20               |
| 2_R2   | 400                        | 675                        | 0.12               | 4_O4        | 300                        | 599                        | 0.22               |
| 2_Y    | 300                        | 564                        | 0.15               | POZ-DBPHZ_O | 400                        | 633                        | 0.06               |
|        |                            |                            |                    | POZ-DBPHZ_R | 400                        | 648                        | 0.08               |

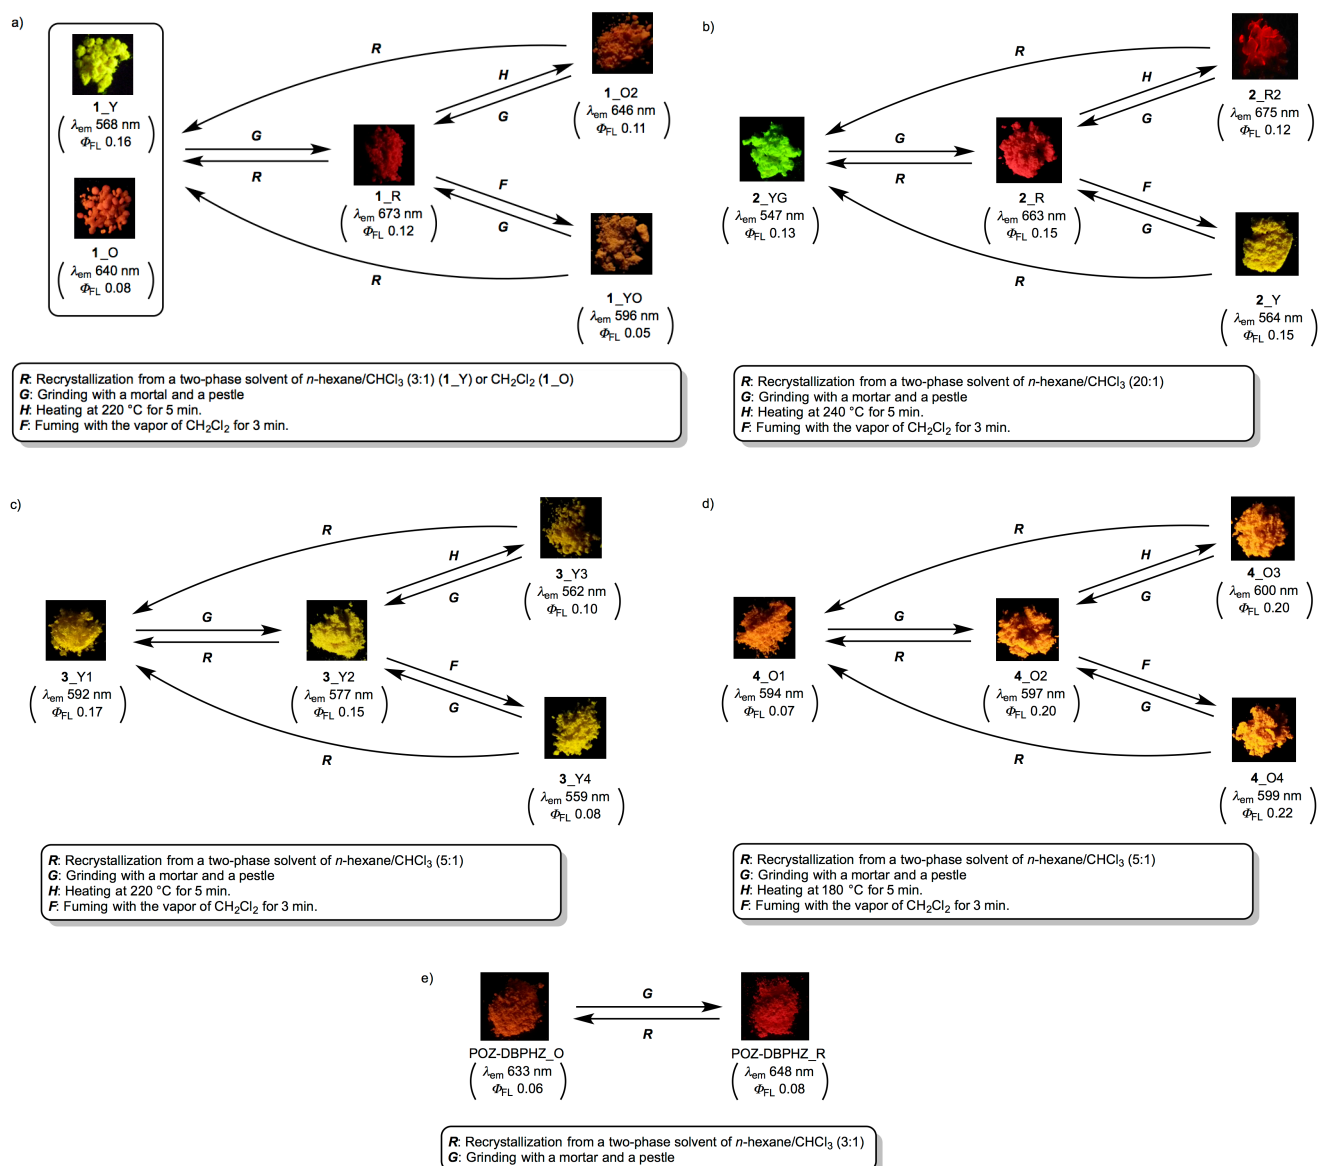

**Figure S1.** MCL properties of **1–4** and POZ-DBPHZ.

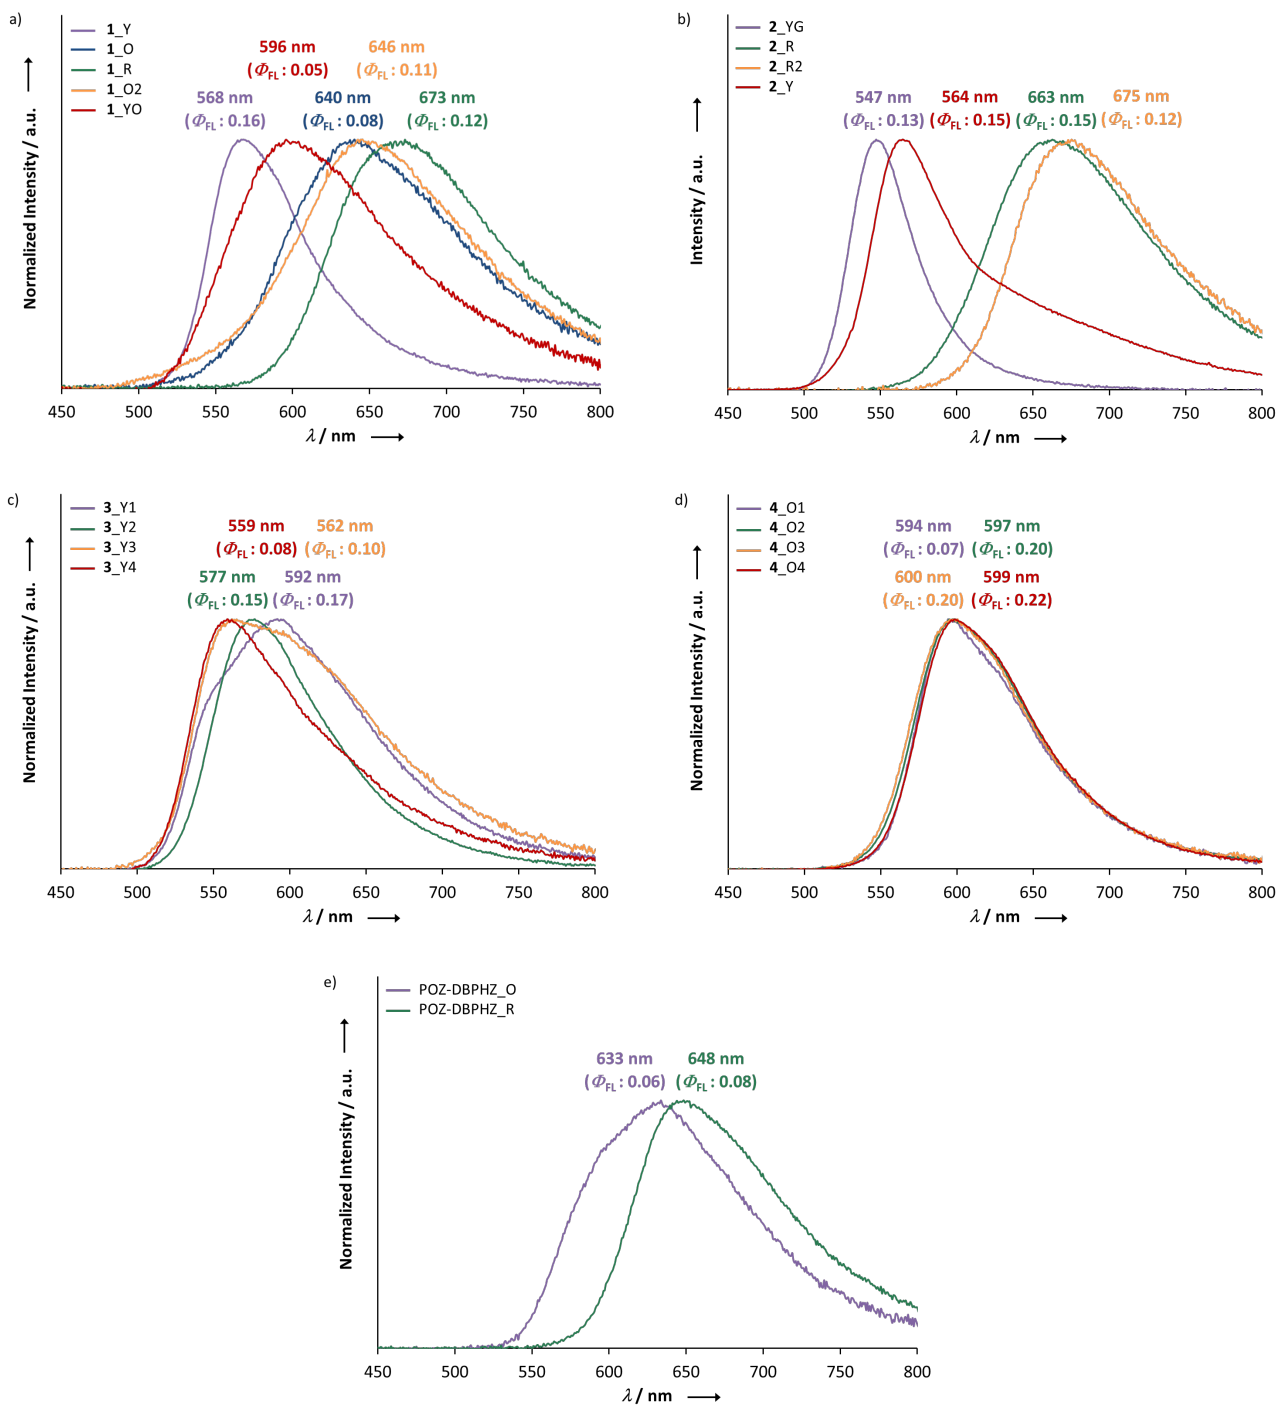

**Figure S2.** Emission spectra of solid samples of 1–4 and POZ-DBPHZ.

## Acid-induced Emission Quenching

**Table S2.** Summary of the properties of acid/base-vapor-treated solids 1–4.

| Sample        | $\lambda_{\text{ex}}$ (nm) | $\lambda_{\text{em}}$ (nm) | $\Phi_{\text{FL}}$ | Sample        | $\lambda_{\text{ex}}$ (nm) | $\lambda_{\text{em}}$ (nm) | $\Phi_{\text{FL}}$ |
|---------------|----------------------------|----------------------------|--------------------|---------------|----------------------------|----------------------------|--------------------|
| 1_R           | 400                        | 673                        | 0.12               | 3_Y2          | 300                        | 577                        | 0.15               |
| 1_TFA         | 300                        | ND                         | <0.01              | 3_TFA         | 300                        | ND                         | <0.01              |
| 1_TFA_TEA     | 300                        | 601                        | 0.05               | 3_TFA_TEA     | 300                        | 596                        | 0.17               |
| 1_TFA_TEA_TFA | 300                        | ND                         | <0.01              | 3_TFA_TEA_TFA | 300                        | ND                         | <0.01              |
| 2_R           | 300                        | 663                        | 0.15               | 4_O2          | 300                        | 597                        | 0.20               |
| 2_TFA         | 300                        | ND                         | <0.01              | 4_TFA         | 300                        | ND                         | <0.01              |
| 2_TFA_TEA     | 300                        | 562                        | 0.06               | 4_TFA_TEA     | 300                        | 602                        | 0.05               |
| 2_TFA_TEA_TFA | 300                        | ND                         | <0.01              | 4_TFA_TEA_TFA | 300                        | ND                         | <0.01              |

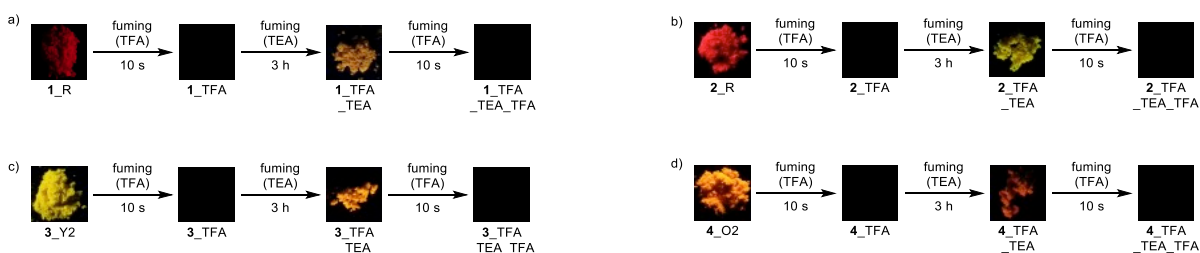

**Figure S3.** Emission “turn-off/on” cycles induced by the treatment of 1–4 with acid/based vapor.

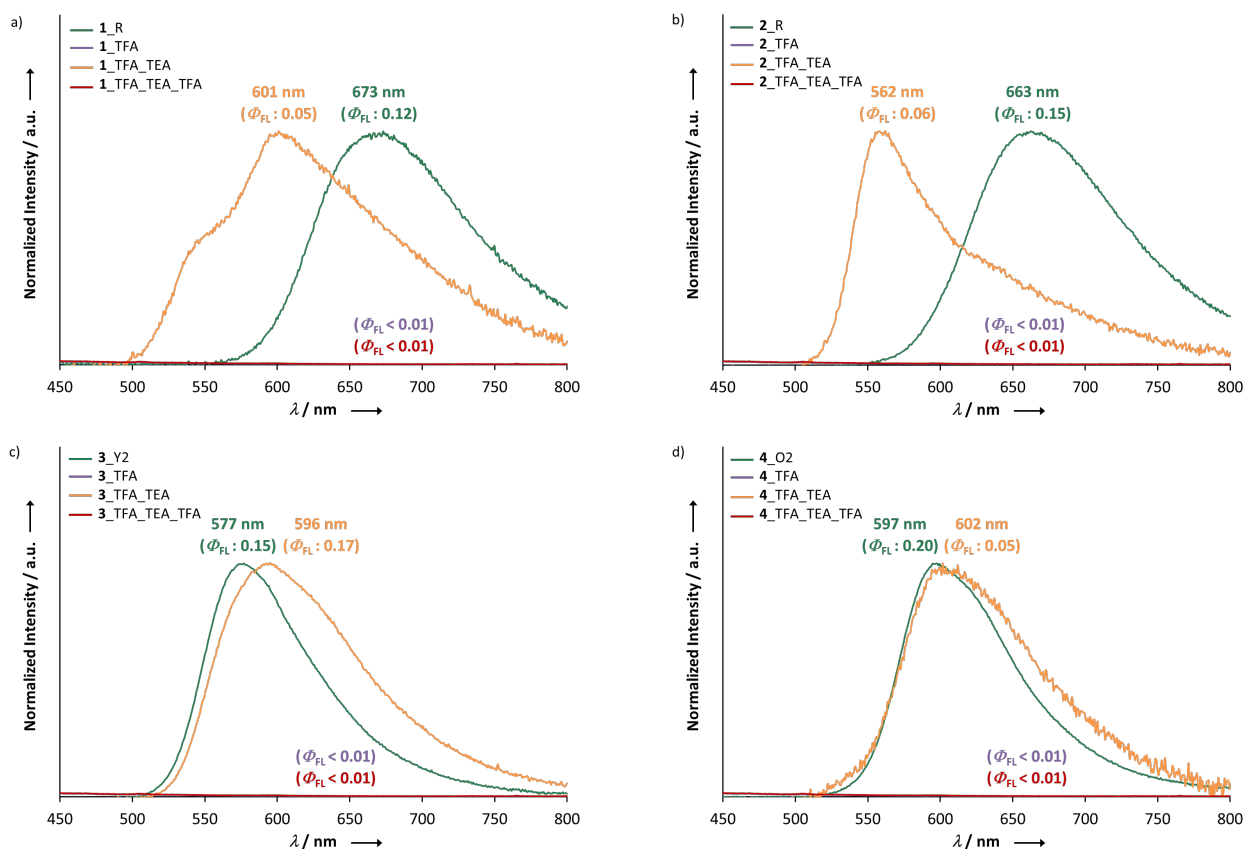

**Figure S4.** Emission spectra of acid/base-fumed solid samples of 1–4.

## Powder X-Ray Diffraction (PXRD) Analysis

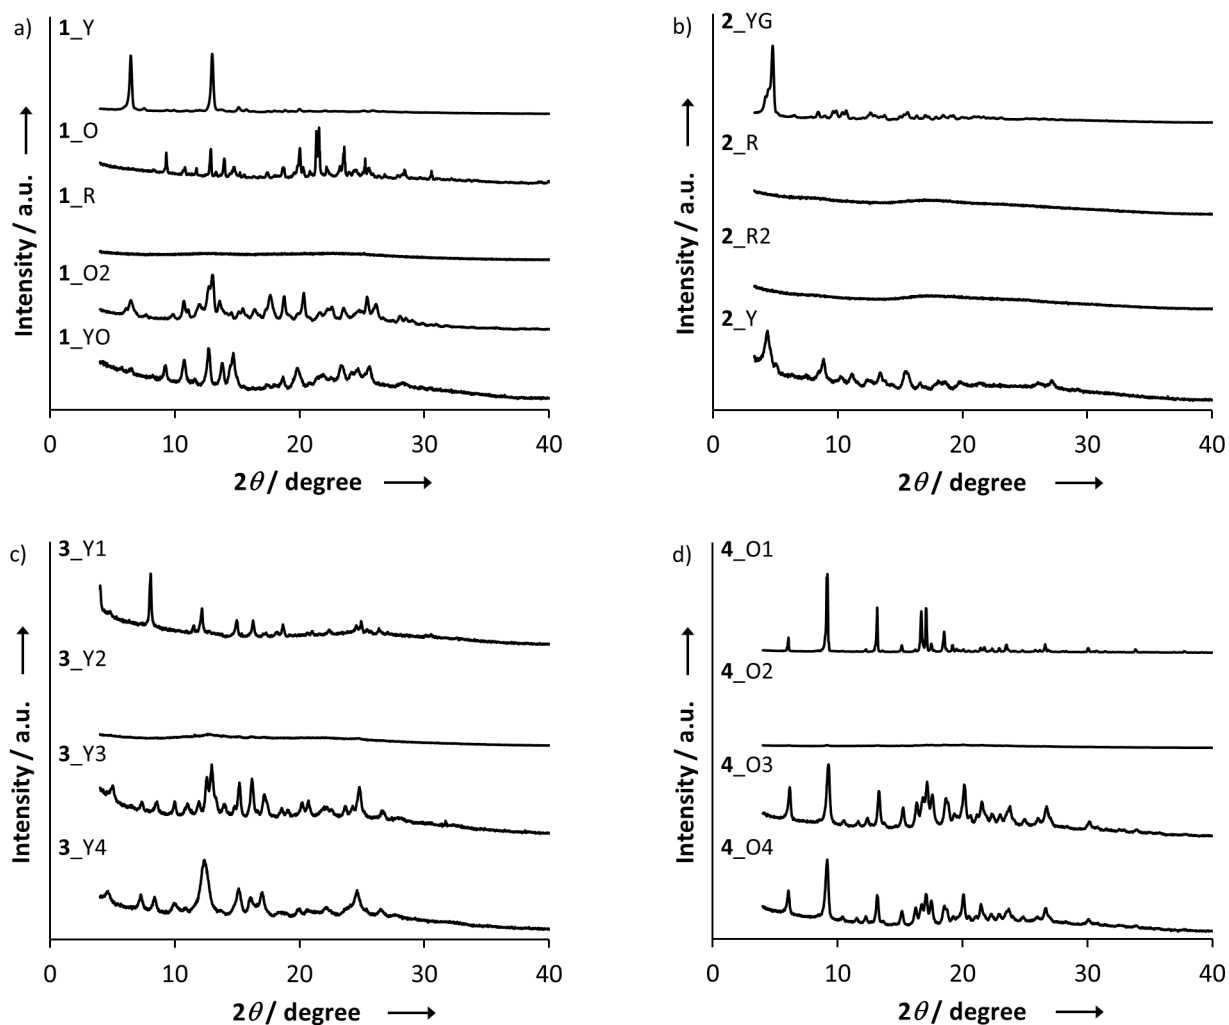

Figure S5. PXRD patterns of the solid samples 1–4.

## Differential Scanning Calorimetry (DSC) Analysis

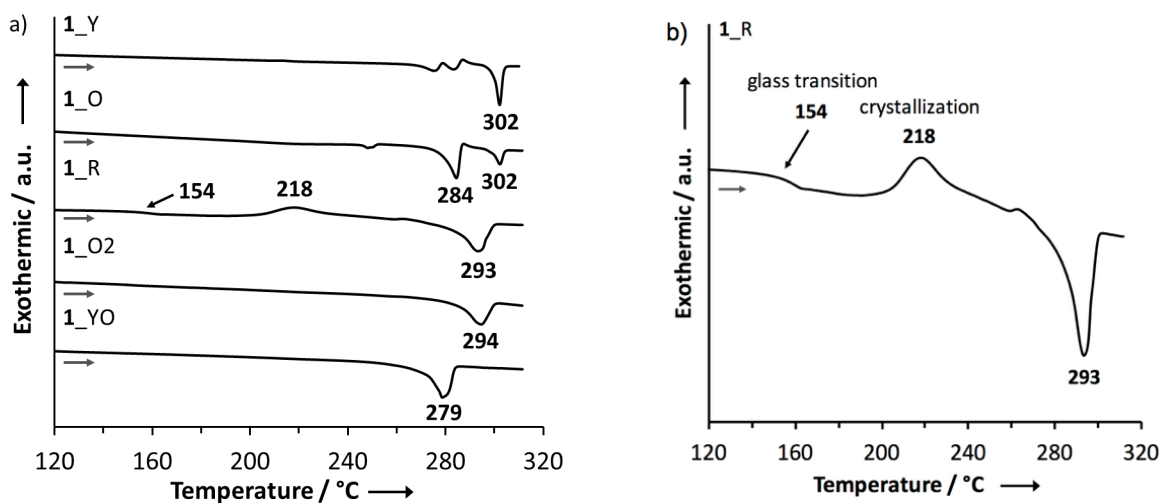

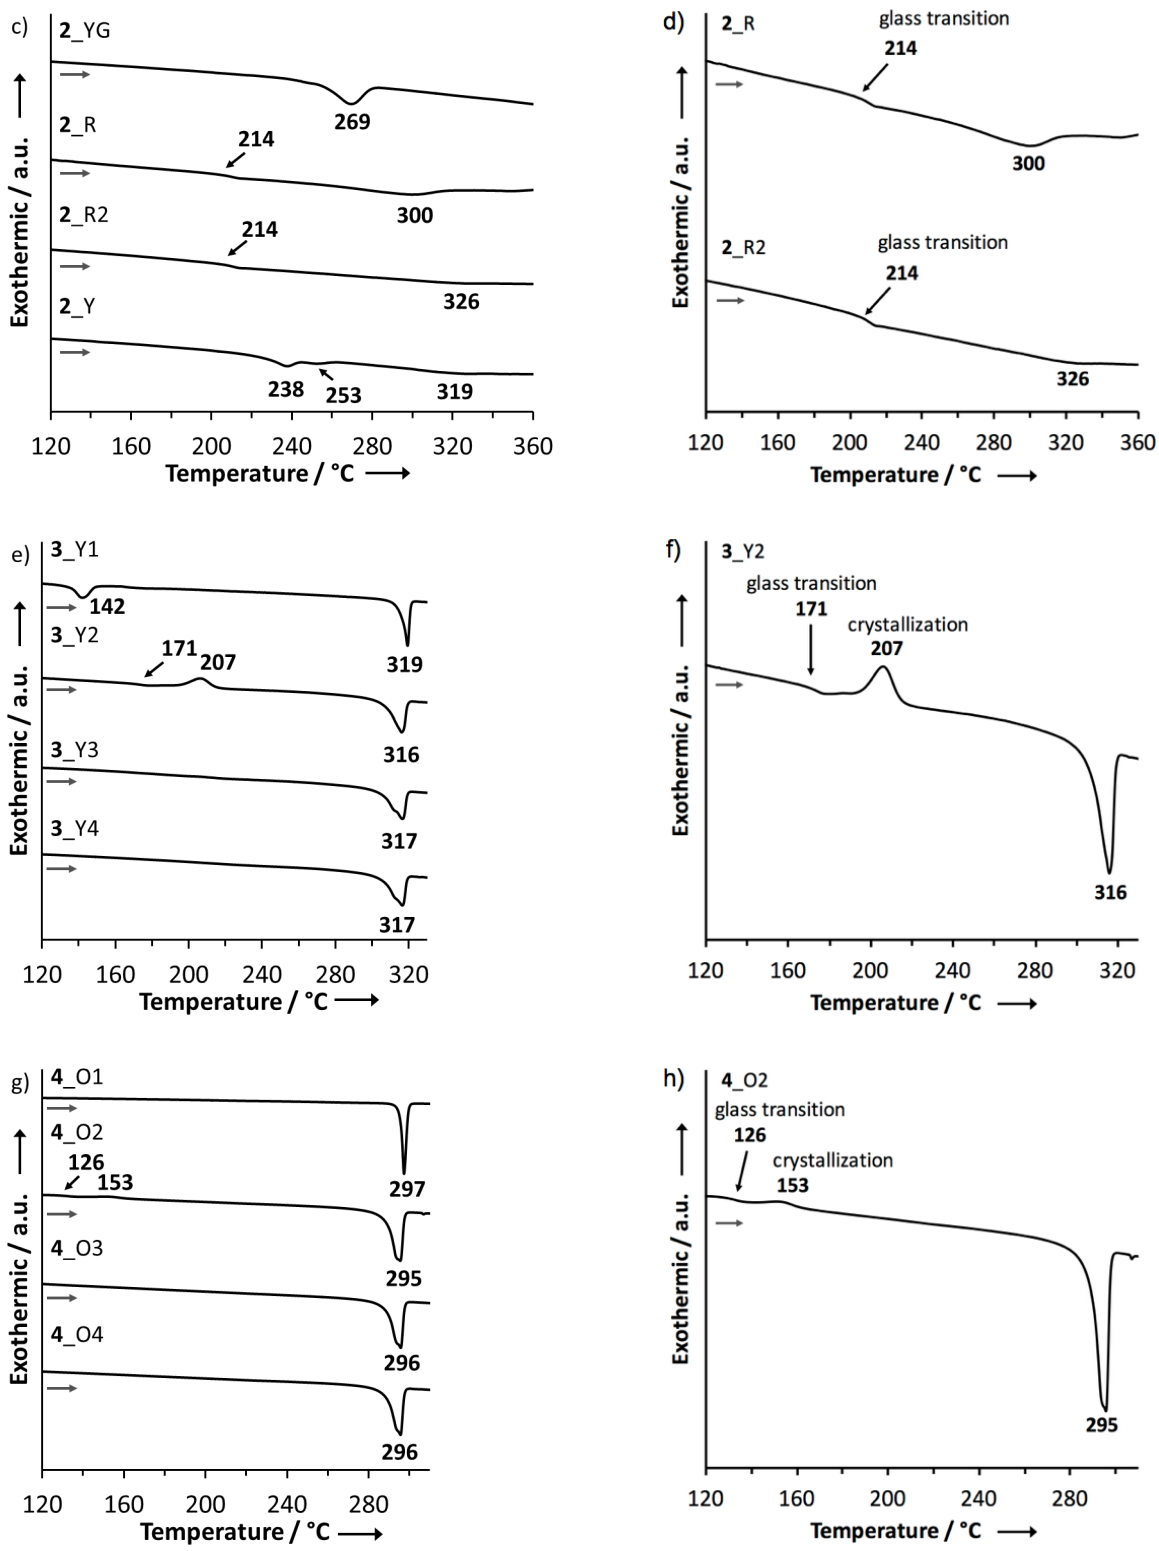

Figure S6. DSC curves of the solid samples 1–4.

### Single Crystal X-ray Crystallographic Data

The X-ray diffraction data of the single crystal of **1\_O** were collected on a Rigaku R-Axis RAPID diffractometer with graphite monochromated CuK $\alpha$  radiation ( $\lambda = 1.54187 \text{ \AA}$ ) to a  $2\theta_{\max}$  value of  $136.5^\circ$  at 123 K. The crystal structure was solved by direct methods (SIR92)<sup>S7</sup> and expanded using Fourier techniques. The non-hydrogen atoms were refined anisotropically, and hydrogen atoms were refined using the riding model. The crystal data are summarized in Table S3. CCDC-1452024 contains the supplementary crystallographic data for **1\_O**, which are available free of charge from the Cambridge Crystallographic Data Center (CCDC) via [www.ccdc.cam.ac.uk/data\\_request/cif](http://www.ccdc.cam.ac.uk/data_request/cif).

**Table S3.** Summary of crystallographic data of **1\_O**.

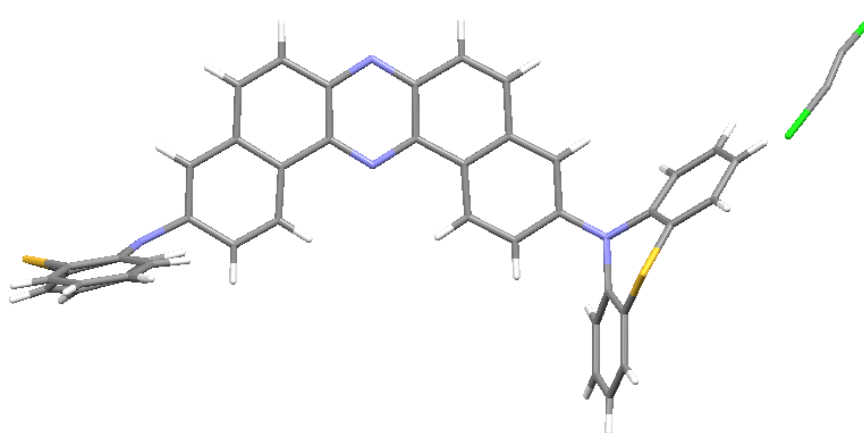

|                              |                                                                 |                            |
|------------------------------|-----------------------------------------------------------------|----------------------------|
| Empirical Formula            | C <sub>45</sub> H <sub>26</sub> ClN <sub>4</sub> S <sub>2</sub> |                            |
| Formula Weight               | 722.30                                                          |                            |
| Crystal System               | monoclinic                                                      |                            |
| Space Group                  | C2/c (#15)                                                      |                            |
| Unit cell dimensions         | $a = 30.0933(6) \text{ \AA}$                                    | $\alpha = 90^\circ$        |
|                              | $b = 8.4390(2) \text{ \AA}$                                     | $\beta = 95.5660(7)^\circ$ |
|                              | $c = 26.6268(5) \text{ \AA}$                                    | $\gamma = 90^\circ$        |
| $V$                          | $6730.2(3) \text{ \AA}^3$                                       |                            |
| $Z$                          | 8                                                               |                            |
| Density (calculated)         | $1.426 \text{ g/cm}^3$                                          |                            |
| Absorption coefficient       | $24.879 \text{ cm}^{-1}$                                        |                            |
| $R_1 [I > 2\sigma(I)]$       | 0.1215                                                          |                            |
| $wR_2$ (all data)            | 0.4004                                                          |                            |
| Crystal size                 | $0.300 \times 0.100 \times 0.100 \text{ mm}$                    |                            |
| Goodness-of-fit on $F^2$     | 1.473                                                           |                            |
| Reflections collected/unique | 43374/6159 [ $R(\text{int}) = 0.0648$ ]                         |                            |



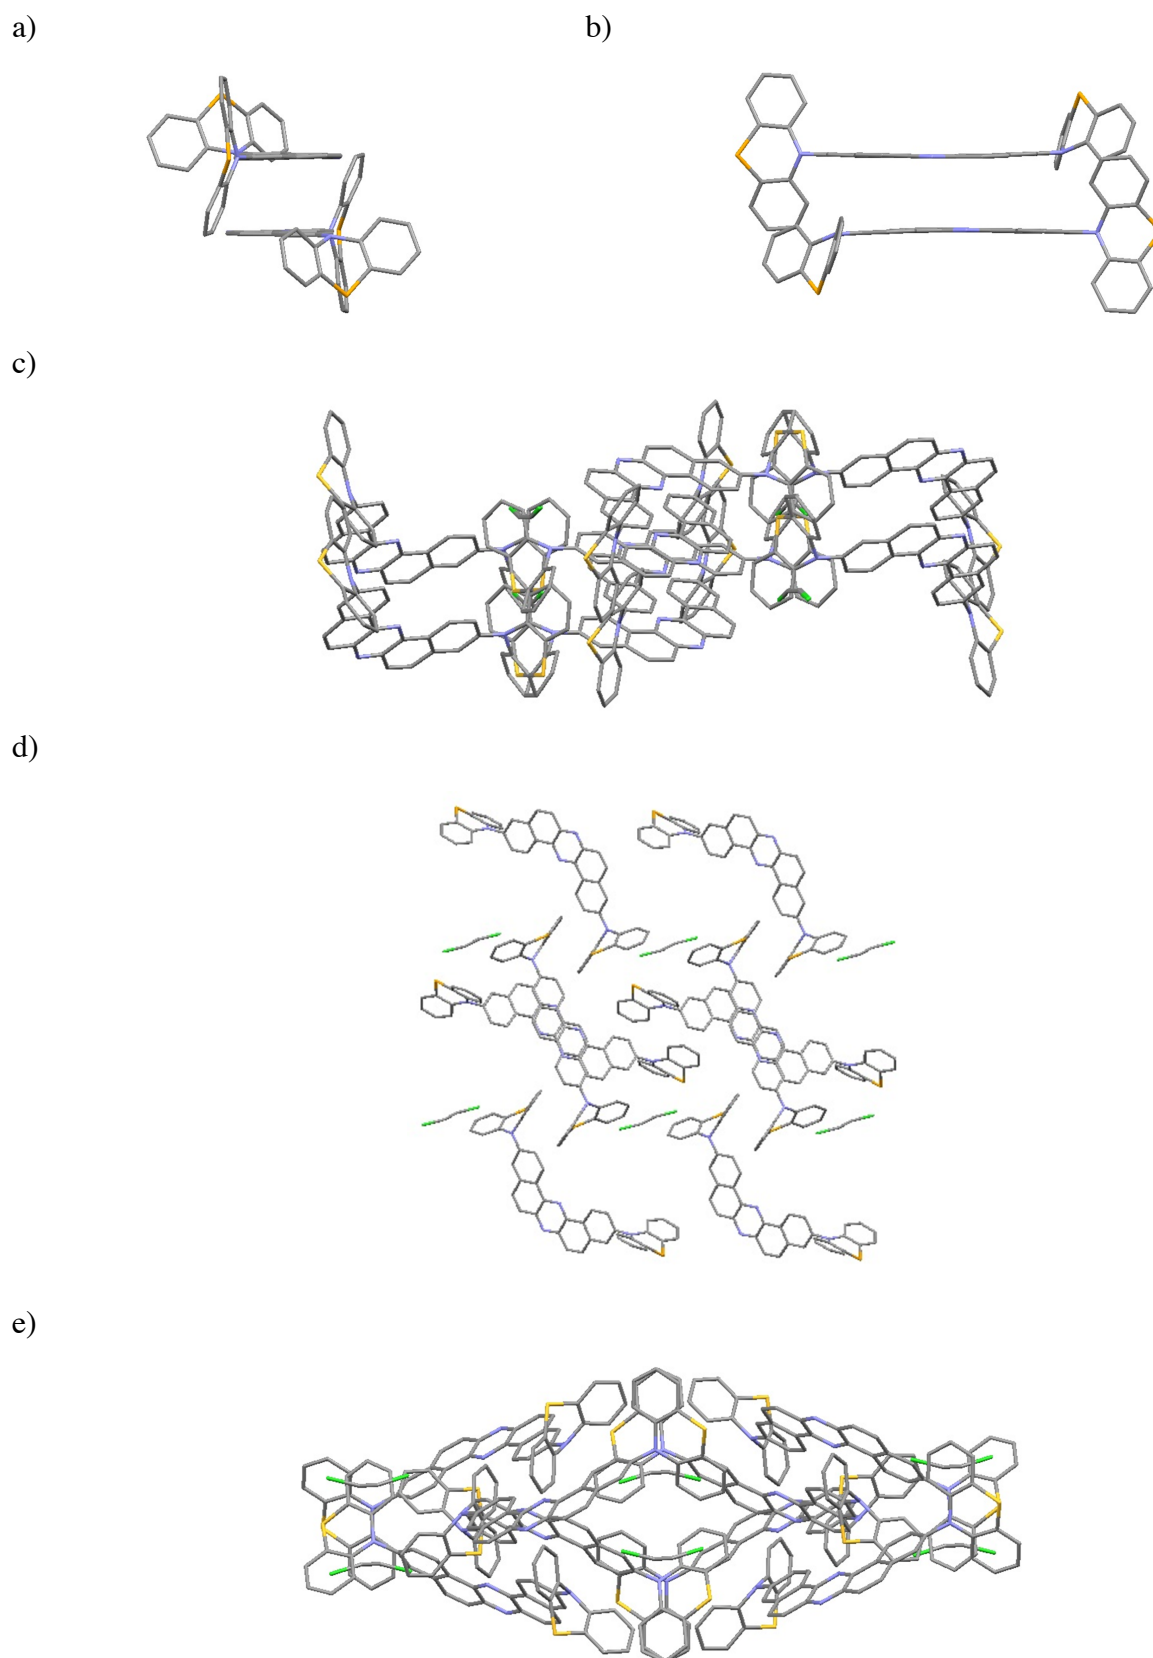

**Figure S7.** Packing structures of **1\_O**. a) Side and b) front view of a pair of two molecules; A view seen along the c) *a* axis, d) *b* axis and e) *c* axis.

## UV-vis Absorption and Emission Spectra

Solvents were purged with N<sub>2</sub> for 30 min before use. Steady-state UV-vis absorption and emission spectra were measured at room temperature using the solutions (1.0 × 10<sup>-5</sup> M).

**Table S4.** Summary of UV-vis absorption and emission properties of solutions of 1–4.

| Compound | Solvent                         | Absorption                   |                                                | Emission                   |                            |                    |
|----------|---------------------------------|------------------------------|------------------------------------------------|----------------------------|----------------------------|--------------------|
|          |                                 | $\lambda_{\text{abs}}$ (nm)  | $\epsilon$ (M <sup>-1</sup> cm <sup>-1</sup> ) | $\lambda_{\text{ex}}$ (nm) | $\lambda_{\text{em}}$ (nm) | $\phi_{\text{PL}}$ |
| 1        | cyclohexane                     | 296, 390, 413                | 69,900, 13,900, 22,000                         | 300                        | 543                        | 0.06               |
| 1        | toluene                         | 298, 394, 416                | 58,800, 11,600, 19,300                         | 300                        | 657                        | 0.07               |
| 1        | THF                             | 297, 394, 416                | 63,200, 12,800, 20,500                         | 300                        | ND                         | <0.01              |
| 1        | CH <sub>2</sub> Cl <sub>2</sub> | 297, 395, 417                | 53,200, 9,000, 16,800                          | 300                        | ND                         | <0.01              |
| 1        | DMF                             | 297, 396, 418                | 62,000, 12,200, 19,800                         | 300                        | ND                         | <0.01              |
| 2        | cyclohexane                     | 297, 332, 391, 413, 451      | 65,100, 25,300, 12,500, 21,200, 12,400         | 300                        | 575                        | 0.11               |
| 2        | toluene                         | 298, 334, 394, 416, 451      | 60,600, 26,000, 12,400, 20,100, 13,300         | 300                        | 682                        | 0.04               |
| 2        | THF                             | 297, 335, 393, 416, 452      | 57,400, 27,800, 10,300, 17,500, 15,300         | 300                        | ND                         | <0.01              |
| 3        | cyclohexane                     | 296, 391, 413                | 94,100, 12,700, 18,600                         | 300                        | 484                        | 0.16               |
| 3        | toluene                         | 297, 395, 416                | 91,600, 13,200, 19,000                         | 300                        | 552                        | 0.11               |
| 3        | THF                             | 296, 394, 416                | 98,500, 14,400, 20,400                         | 300                        | 661                        | 0.07               |
| 3        | CH <sub>2</sub> Cl <sub>2</sub> | 296, 395, 416                | 97,600, 14,000, 19,800                         | 300                        | 699                        | 0.05               |
| 3        | DMF                             | 297, 396, 418                | 94,600, 14,500, 20,500                         | 300                        | ND                         | <0.01              |
| 4        | cyclohexane                     | 275, 319, 337, 373, 444, 471 | 57,800, 48,900, 35,700, 26,000, 29,800, 55,500 | 300                        | 492                        | 0.56               |
| 4        | toluene                         | 321, 341, 374, 473           | 46,400, 35,000, 24,300, 42,900                 | 300                        | 512                        | 0.44               |
| 4        | THF                             | 277, 319, 341, 474           | 53,800, 42,400, 33,100, 37,700                 | 300                        | 552                        | 0.59               |
| 4        | CH <sub>2</sub> Cl <sub>2</sub> | 278, 321, 343, 476           | 54,000, 42,800, 33,800, 36,400                 | 300                        | 576                        | 0.64               |
| 4        | DMF                             | 278, 319, 343, 477           | 55,200, 41,200, 34,100, 36,200                 | 300                        | 626                        | 0.34               |

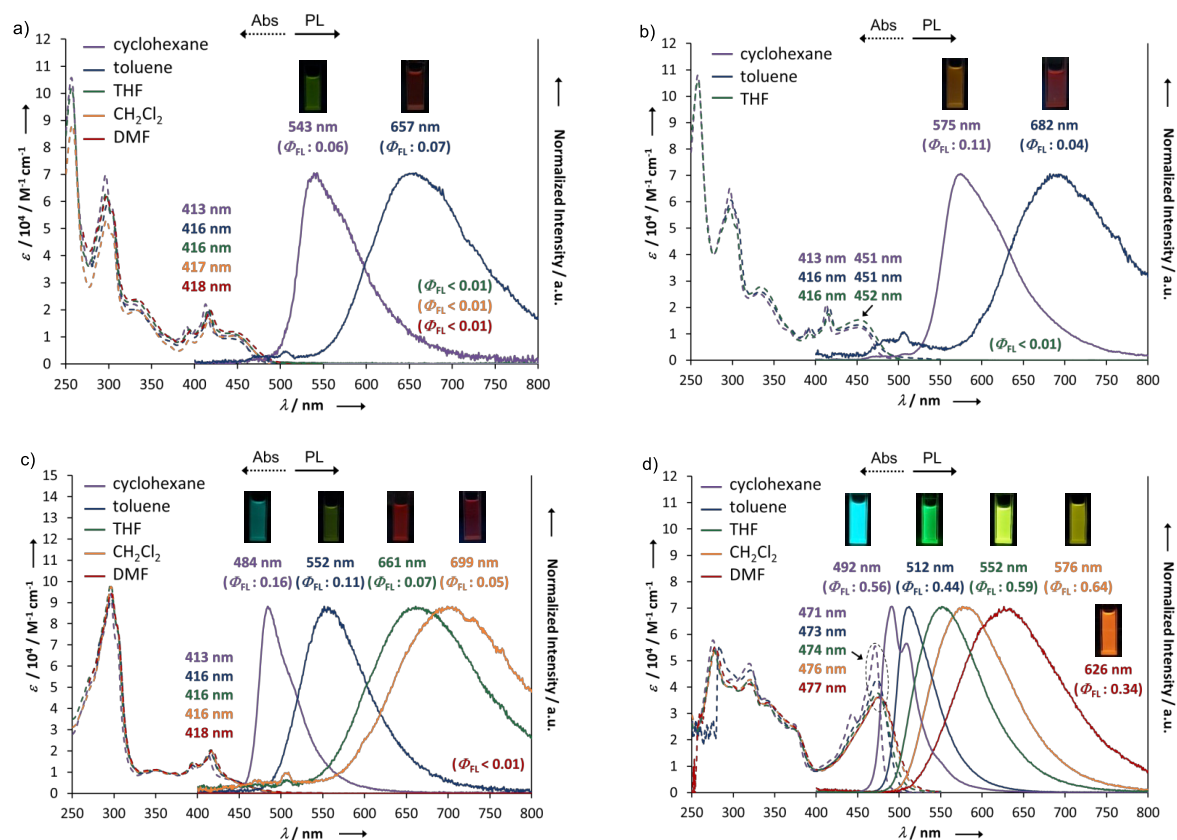

**Figure S8.** UV-vis absorption and emission spectra of solutions of 1–4.

## Concentration Effect on Emission Properties

Cyclohexane was purged with N<sub>2</sub> for 30 min before use. Emission spectra of **2** were measured at room temperature using the cyclohexane.

**Table S5.** The summary of the concentration effect on the emission properties of **2**

| Concentration (M)  | $\lambda_{\text{ex}}$ (nm) | $\lambda_{\text{em}}$ (nm) | $\Phi_{\text{FL}}$ |
|--------------------|----------------------------|----------------------------|--------------------|
| $1 \times 10^{-5}$ | 300                        | 575                        | 0.11               |
| $1 \times 10^{-4}$ | 300                        | 575                        | 0.11               |
| $1 \times 10^{-3}$ | 300                        | 577                        | 0.10               |

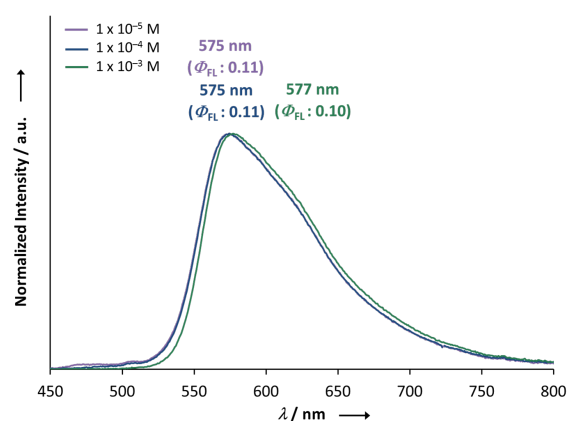

**Figure S9.** Emission spectra of cyclohexane solutions of **2** ranging from  $1 \times 10^{-5}$  to  $1 \times 10^{-3}$  M.

## Diffuse Reflection Spectra

**Table S6.** Summary of diffuse reflection spectra of solids **1**.

| Sample       | $\lambda_{\text{onset}}$ (nm) |
|--------------|-------------------------------|
| <b>1</b> _Y  | 516                           |
| <b>1</b> _O  | 533                           |
| <b>1</b> _R  | 587                           |
| <b>1</b> _O2 | 573                           |
| <b>1</b> _YO | 526                           |

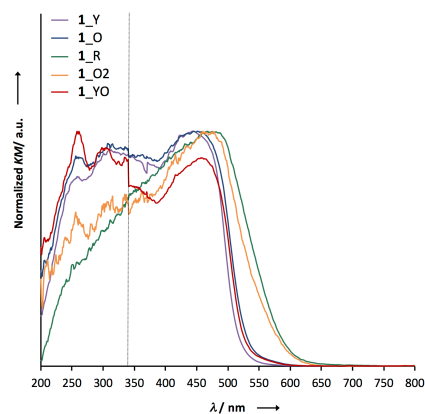

**Figure S10.** Diffuse reflection spectra of solids **1**. The dotted line indicates switching of the lamp.

## Theoretical Calculations

All the molecules were geometrically optimized by the DFT method at the B3LYP/6-31+G(d,p) level of theory using Gaussian 09 package.<sup>S8</sup> The relative molecular energies of conformers **1** (Fig. 2) were calculated from the sum of electronic and thermal free energies, which were obtained from frequency analysis of the optimized structures of the conformers at the B3LYP/6-31+G(d,p) level. The excitation energies of the geometrically optimized molecules were calculated with the TD-DFT method at the same level of theory. Cartesian coordinates of the initial and optimized structures of **1** are listed below (Tables S7–14).

**Table S7.** Cartesian coordinates of the initial structure of axial-axial conformer (*syn*) of **1**.

| atom | <i>x</i> | <i>y</i> | <i>z</i> |
|------|----------|----------|----------|
| S    | -1.94383 | 1.584678 | -7.53526 |
| S    | -1.94383 | 1.584678 | 7.535259 |
| N    | -0.1227  | -4.22501 | 0        |
| N    | 0.212969 | -1.42433 | 0        |
| N    | 0.51404  | 0.577215 | -6.18312 |
| N    | 0.51404  | 0.577215 | 6.183122 |
| C    | -0.04003 | -3.53497 | -1.14688 |
| C    | -0.12537 | -4.24203 | -2.39632 |
| C    | -0.04128 | -3.57549 | -3.57989 |
| C    | 0.136751 | -2.14347 | -3.63083 |
| C    | 0.228934 | -1.47497 | -4.86787 |
| C    | 0.402873 | -0.09012 | -4.93905 |
| C    | 0.455619 | 0.637426 | -3.72001 |
| C    | 0.367217 | -0.00922 | -2.50195 |
| C    | 0.216229 | -1.40759 | -2.41743 |
| C    | 0.130924 | -2.10807 | -1.14968 |
| C    | 0.130924 | -2.10807 | 1.149681 |
| C    | 0.216229 | -1.40759 | 2.41743  |
| C    | 0.367217 | -0.00922 | 2.501955 |
| C    | 0.455619 | 0.637426 | 3.720007 |
| C    | 0.402873 | -0.09012 | 4.93905  |
| C    | 0.228934 | -1.47497 | 4.86787  |
| C    | 0.136751 | -2.14347 | 3.630835 |
| C    | -0.04128 | -3.57549 | 3.579887 |
| C    | -0.12537 | -4.24203 | 2.396319 |
| C    | -0.04003 | -3.53497 | 1.146883 |
| C    | 0.230813 | -0.10078 | -7.41052 |

|   |          |          |          |
|---|----------|----------|----------|
| C | 1.090529 | -1.08326 | -7.91612 |
| C | 0.778046 | -1.74805 | -9.10253 |
| C | -0.37861 | -1.40853 | -9.81242 |
| C | -1.21077 | -0.38966 | -9.34713 |
| C | -0.90994 | 0.261783 | -8.14519 |
| C | -0.64448 | 2.616342 | -6.87297 |
| C | -0.71458 | 4.010944 | -6.97032 |
| C | 0.319223 | 4.796103 | -6.45833 |
| C | 1.444016 | 4.189658 | -5.88928 |
| C | 1.525383 | 2.798653 | -5.81371 |
| C | 0.466793 | 2.004107 | -6.27011 |
| C | 0.466793 | 2.004107 | 6.270107 |
| C | 1.525383 | 2.798653 | 5.813715 |
| C | 1.444016 | 4.189658 | 5.889283 |
| C | 0.319223 | 4.796103 | 6.458333 |
| C | -0.71458 | 4.010944 | 6.970321 |
| C | -0.64448 | 2.616342 | 6.872969 |
| C | -0.90994 | 0.261783 | 8.145194 |
| C | -1.21077 | -0.38966 | 9.347135 |
| C | -0.37861 | -1.40853 | 9.812416 |
| C | 0.778046 | -1.74805 | 9.102527 |
| C | 1.090529 | -1.08326 | 7.916118 |
| C | 0.230813 | -0.10078 | 7.410521 |
| H | -0.25825 | -5.31842 | -2.35198 |
| H | -0.10761 | -4.1189  | -4.51891 |
| H | 0.148807 | -2.06563 | -5.77179 |
| H | 0.550637 | 1.71517  | -3.73503 |
| H | 0.407039 | 0.564279 | -1.58265 |
| H | 0.407039 | 0.564279 | 1.582646 |
| H | 0.550637 | 1.71517  | 3.735033 |
| H | 0.148807 | -2.06563 | 5.771794 |
| H | -0.10761 | -4.1189  | 4.518909 |
| H | -0.25825 | -5.31842 | 2.351978 |
| H | 1.99214  | -1.32761 | -7.36342 |
| H | 1.442454 | -2.52021 | -9.47817 |
| H | -0.61957 | -1.91777 | -10.7406 |
| H | -2.08687 | -0.09133 | -9.91493 |
| H | -1.57105 | 4.473344 | -7.45151 |

|   |          |          |          |
|---|----------|----------|----------|
| H | 0.257513 | 5.877925 | -6.52721 |
| H | 2.262575 | 4.797772 | -5.51659 |
| H | 2.399547 | 2.315833 | -5.38845 |
| H | 2.399547 | 2.315833 | 5.388447 |
| H | 2.262575 | 4.797772 | 5.516592 |
| H | 0.257513 | 5.877925 | 6.527207 |
| H | -1.57105 | 4.473344 | 7.451513 |
| H | -2.08687 | -0.09133 | 9.914932 |
| H | -0.61957 | -1.91777 | 10.7406  |
| H | 1.442454 | -2.52021 | 9.478167 |
| H | 1.99214  | -1.32761 | 7.363424 |

**Table S8.** Cartesian coordinates of the optimized structure of axial-axial conformer (*syn*) of **1**.

| atom | <i>x</i> | <i>y</i> | <i>z</i> |
|------|----------|----------|----------|
| S    | -1.58163 | 1.943157 | 7.538075 |
| S    | -1.58163 | 1.943157 | -7.53808 |
| N    | 4.223625 | 0.126701 | 0        |
| N    | 1.42338  | -0.21275 | 0        |
| N    | -0.57769 | -0.51476 | 6.183422 |
| N    | -0.57769 | -0.51476 | -6.18342 |
| C    | 3.533652 | 0.043191 | 1.146888 |
| C    | 4.240666 | 0.129339 | 2.396299 |
| C    | 3.57428  | 0.044618 | 3.579896 |
| C    | 2.142484 | -0.13528 | 3.630935 |
| C    | 1.47416  | -0.22788 | 4.867974 |
| C    | 0.089429 | -0.40318 | 4.939235 |
| C    | -0.63809 | -0.4571  | 3.720222 |
| C    | 0.008449 | -0.36817 | 2.502132 |
| C    | 1.406655 | -0.21579 | 2.417517 |
| C    | 2.107027 | -0.12976 | 1.14973  |
| C    | 2.107027 | -0.12976 | -1.14973 |
| C    | 1.406655 | -0.21579 | -2.41752 |
| C    | 0.008449 | -0.36817 | -2.50213 |
| C    | -0.63809 | -0.4571  | -3.72022 |
| C    | 0.089429 | -0.40318 | -4.93924 |
| C    | 1.47416  | -0.22788 | -4.86797 |
| C    | 2.142484 | -0.13528 | -3.63094 |
| C    | 3.57428  | 0.044618 | -3.5799  |

|   |          |          |          |
|---|----------|----------|----------|
| C | 4.240666 | 0.129339 | -2.3963  |
| C | 3.533652 | 0.043191 | -1.14689 |
| C | 0.101092 | -0.23346 | 7.410837 |
| C | 1.082838 | -1.09475 | 7.915254 |
| C | 1.74832  | -0.78422 | 9.101797 |
| C | 1.41028  | 0.372068 | 9.812993 |
| C | 0.392322 | 1.205943 | 9.348768 |
| C | -0.25996 | 0.906866 | 8.146848 |
| C | -2.61518 | 0.645702 | 6.874872 |
| C | -4.00967 | 0.717706 | 6.972522 |
| C | -4.79635 | -0.3148  | 6.460255 |
| C | -4.19153 | -1.44005 | 5.890405 |
| C | -2.80064 | -1.52316 | 5.814318 |
| C | -2.0045  | -0.46584 | 6.27095  |
| C | -2.0045  | -0.46584 | -6.27095 |
| C | -2.80064 | -1.52316 | -5.81432 |
| C | -4.19153 | -1.44005 | -5.89041 |
| C | -4.79635 | -0.3148  | -6.46026 |
| C | -4.00967 | 0.717706 | -6.97252 |
| C | -2.61518 | 0.645702 | -6.87487 |
| C | -0.25996 | 0.906866 | -8.14685 |
| C | 0.392322 | 1.205943 | -9.34877 |
| C | 1.41028  | 0.372068 | -9.81299 |
| C | 1.74832  | -0.78422 | -9.1018  |
| C | 1.082838 | -1.09475 | -7.91525 |
| C | 0.101092 | -0.23346 | -7.41084 |
| H | 5.316891 | 0.26352  | 2.351932 |
| H | 4.117594 | 0.111661 | 4.518924 |
| H | 2.064651 | -0.14632 | 5.77188  |
| H | -1.71576 | -0.55279 | 3.735208 |
| H | -0.56506 | -0.40887 | 1.582869 |
| H | -0.56506 | -0.40887 | -1.58287 |
| H | -1.71576 | -0.55279 | -3.73521 |
| H | 2.064651 | -0.14632 | -5.77188 |
| H | 4.117594 | 0.111661 | -4.51892 |
| H | 5.316891 | 0.26352  | -2.35193 |
| H | 1.326221 | -1.996   | 7.361522 |
| H | 2.519802 | -1.44994 | 9.476494 |

|   |          |          |          |
|---|----------|----------|----------|
| H | 1.920077 | 0.611519 | 10.74126 |
| H | 0.095277 | 2.081922 | 9.917428 |
| H | -4.47076 | 1.574534 | 7.45433  |
| H | -5.87807 | -0.2517  | 6.529433 |
| H | -4.80073 | -2.25771 | 5.517514 |
| H | -2.31926 | -2.39787 | 5.388522 |
| H | -2.31926 | -2.39787 | -5.38852 |
| H | -4.80073 | -2.25771 | -5.51751 |
| H | -5.87807 | -0.2517  | -6.52943 |
| H | -4.47076 | 1.574534 | -7.45433 |
| H | 0.095277 | 2.081922 | -9.91743 |
| H | 1.920077 | 0.611519 | -10.7413 |
| H | 2.519802 | -1.44994 | -9.47649 |
| H | 1.326221 | -1.996   | -7.36152 |

**Table S9.** Cartesian coordinates of the initial structure of axial-axial conformer (*anti*) of **1**.

| atom | <i>x</i> | <i>y</i> | <i>z</i> |
|------|----------|----------|----------|
| S    | -1.72669 | 7.778551 | -1.34219 |
| S    | 1.726692 | -7.77855 | -1.34219 |
| N    | 0        | 0        | 4.214025 |
| N    | 0        | 0        | 1.393306 |
| N    | 0.662083 | 6.144943 | -0.63405 |
| N    | -0.66208 | -6.14494 | -0.63405 |
| C    | 0.109898 | 1.141667 | 3.518918 |
| C    | 0.229265 | 2.385941 | 4.230318 |
| C    | 0.347672 | 3.563382 | 3.55794  |
| C    | 0.359448 | 3.613081 | 2.114904 |
| C    | 0.492252 | 4.842499 | 1.439075 |
| C    | 0.508747 | 4.91121  | 0.0432   |
| C    | 0.35511  | 3.700494 | -0.68412 |
| C    | 0.225081 | 2.490091 | -0.03048 |
| C    | 0.23363  | 2.405617 | 1.375836 |
| C    | 0.110634 | 1.144269 | 2.081972 |
| C    | -0.11063 | -1.14427 | 2.081972 |
| C    | -0.23363 | -2.40562 | 1.375836 |
| C    | -0.22508 | -2.49009 | -0.03048 |
| C    | -0.35511 | -3.70049 | -0.68412 |
| C    | -0.50875 | -4.91121 | 0.0432   |



|   |          |          |          |
|---|----------|----------|----------|
| C | -0.49225 | -4.8425  | 1.439075 |
| C | -0.35945 | -3.61308 | 2.114904 |
| C | -0.34767 | -3.56338 | 3.55794  |
| C | -0.22927 | -2.38594 | 4.230318 |
| C | -0.1099  | -1.14167 | 3.518918 |
| C | 0.456721 | 6.253753 | -2.04524 |
| C | 1.355013 | 5.691441 | -2.96048 |
| C | 1.117347 | 5.79218  | -4.33185 |
| C | 0        | 6.491315 | -4.80024 |
| C | -0.86796 | 7.107199 | -3.89762 |
| C | -0.64349 | 6.985836 | -2.52138 |
| C | -0.47904 | 8.252838 | -0.15509 |
| C | -0.55952 | 9.474693 | 0.523234 |
| C | 0.436247 | 9.83069  | 1.433682 |
| C | 1.535046 | 8.988649 | 1.635336 |
| C | 1.627366 | 7.781013 | 0.942349 |
| C | 0.604357 | 7.387905 | 0.07098  |
| C | -0.45672 | -6.25375 | -2.04524 |
| C | -1.35501 | -5.69144 | -2.96048 |
| C | -1.11735 | -5.79218 | -4.33185 |
| C | 0        | -6.49132 | -4.80024 |
| C | 0.867959 | -7.1072  | -3.89762 |
| C | 0.643485 | -6.98584 | -2.52138 |
| C | 0.47904  | -8.25284 | -0.15509 |
| C | 0.559524 | -9.47469 | 0.523234 |
| C | -0.43625 | -9.83069 | 1.433682 |
| C | -1.53505 | -8.98865 | 1.635336 |
| C | -1.62737 | -7.78101 | 0.942349 |
| C | -0.60436 | -7.38791 | 0.07098  |
| H | 0.221415 | 2.342971 | 5.314911 |
| H | 0.437903 | 4.49822  | 4.105129 |
| H | 0.570309 | 5.743604 | 2.034323 |
| H | 0.324243 | 3.71676  | -1.76554 |
| H | 0.107327 | 1.577425 | -0.60385 |
| H | -0.10733 | -1.57743 | -0.60385 |
| H | -0.32424 | -3.71676 | -1.76554 |
| H | -0.57031 | -5.7436  | 2.034323 |
| H | -0.4379  | -4.49822 | 4.105129 |

|   |          |          |          |
|---|----------|----------|----------|
| H | -0.22142 | -2.34297 | 5.314911 |
| H | 2.227193 | 5.165142 | -2.58575 |
| H | 1.810298 | 5.337108 | -5.03289 |
| H | -0.18211 | 6.579496 | -5.86698 |
| H | -1.71344 | 7.687405 | -4.25468 |
| H | -1.39346 | 10.14251 | 0.329597 |
| H | 0.366614 | 10.77511 | 1.964815 |
| H | 2.325525 | 9.277271 | 2.321351 |
| H | 2.481835 | 7.125949 | 1.079763 |
| H | -2.22719 | -5.16514 | -2.58575 |
| H | -1.8103  | -5.33711 | -5.03289 |
| H | 0.182107 | -6.5795  | -5.86698 |
| H | 1.713439 | -7.68741 | -4.25468 |
| H | 1.393456 | -10.1425 | 0.329597 |
| H | -0.36661 | -10.7751 | 1.964815 |
| H | -2.32553 | -9.27727 | 2.321351 |
| H | -2.48184 | -7.12595 | 1.079763 |

**Table S10.** Cartesian coordinates of the optimized structure of axial-axial conformer (*anti*) of **1**.

| atom | <i>x</i> | <i>y</i> | <i>z</i> |
|------|----------|----------|----------|
| S    | -1.72669 | 7.778551 | -1.34219 |
| S    | 1.726692 | -7.77855 | -1.34219 |
| N    | 0        | 0        | 4.214025 |
| N    | 0        | 0        | 1.393306 |
| N    | 0.662083 | 6.144943 | -0.63405 |
| N    | -0.66208 | -6.14494 | -0.63405 |
| C    | 0.109898 | 1.141667 | 3.518918 |
| C    | 0.229265 | 2.385941 | 4.230318 |
| C    | 0.347672 | 3.563382 | 3.55794  |
| C    | 0.359448 | 3.613081 | 2.114904 |
| C    | 0.492252 | 4.842499 | 1.439075 |
| C    | 0.508747 | 4.91121  | 0.0432   |
| C    | 0.35511  | 3.700494 | -0.68412 |
| C    | 0.225081 | 2.490091 | -0.03048 |
| C    | 0.23363  | 2.405617 | 1.375836 |
| C    | 0.110634 | 1.144269 | 2.081972 |
| C    | -0.11063 | -1.14427 | 2.081972 |
| C    | -0.23363 | -2.40562 | 1.375836 |

|   |          |          |          |
|---|----------|----------|----------|
| C | -0.22508 | -2.49009 | -0.03048 |
| C | -0.35511 | -3.70049 | -0.68412 |
| C | -0.50875 | -4.91121 | 0.0432   |
| C | -0.49225 | -4.8425  | 1.439075 |
| C | -0.35945 | -3.61308 | 2.114904 |
| C | -0.34767 | -3.56338 | 3.55794  |
| C | -0.22927 | -2.38594 | 4.230318 |
| C | -0.1099  | -1.14167 | 3.518918 |
| C | 0.456721 | 6.253753 | -2.04524 |
| C | 1.355013 | 5.691441 | -2.96048 |
| C | 1.117347 | 5.79218  | -4.33185 |
| C | 0        | 6.491315 | -4.80024 |
| C | -0.86796 | 7.107199 | -3.89762 |
| C | -0.64349 | 6.985836 | -2.52138 |
| C | -0.47904 | 8.252838 | -0.15509 |
| C | -0.55952 | 9.474693 | 0.523234 |
| C | 0.436247 | 9.83069  | 1.433682 |
| C | 1.535046 | 8.988649 | 1.635336 |
| C | 1.627366 | 7.781013 | 0.942349 |
| C | 0.604357 | 7.387905 | 0.07098  |
| C | -0.45672 | -6.25375 | -2.04524 |
| C | -1.35501 | -5.69144 | -2.96048 |
| C | -1.11735 | -5.79218 | -4.33185 |
| C | 0        | -6.49132 | -4.80024 |
| C | 0.867959 | -7.1072  | -3.89762 |
| C | 0.643485 | -6.98584 | -2.52138 |
| C | 0.47904  | -8.25284 | -0.15509 |
| C | 0.559524 | -9.47469 | 0.523234 |
| C | -0.43625 | -9.83069 | 1.433682 |
| C | -1.53505 | -8.98865 | 1.635336 |
| C | -1.62737 | -7.78101 | 0.942349 |
| C | -0.60436 | -7.38791 | 0.07098  |
| H | 0.221415 | 2.342971 | 5.314911 |
| H | 0.437903 | 4.49822  | 4.105129 |
| H | 0.570309 | 5.743604 | 2.034323 |
| H | 0.324243 | 3.71676  | -1.76554 |
| H | 0.107327 | 1.577425 | -0.60385 |
| H | -0.10733 | -1.57743 | -0.60385 |

|   |          |          |          |
|---|----------|----------|----------|
| H | -0.32424 | -3.71676 | -1.76554 |
| H | -0.57031 | -5.7436  | 2.034323 |
| H | -0.4379  | -4.49822 | 4.105129 |
| H | -0.22142 | -2.34297 | 5.314911 |
| H | 2.227193 | 5.165142 | -2.58575 |
| H | 1.810298 | 5.337108 | -5.03289 |
| H | -0.18211 | 6.579496 | -5.86698 |
| H | -1.71344 | 7.687405 | -4.25468 |
| H | -1.39346 | 10.14251 | 0.329597 |
| H | 0.366614 | 10.77511 | 1.964815 |
| H | 2.325525 | 9.277271 | 2.321351 |
| H | 2.481835 | 7.125949 | 1.079763 |
| H | -2.22719 | -5.16514 | -2.58575 |
| H | -1.8103  | -5.33711 | -5.03289 |
| H | 0.182107 | -6.5795  | -5.86698 |
| H | 1.713439 | -7.68741 | -4.25468 |
| H | 1.393456 | -10.1425 | 0.329597 |
| H | -0.36661 | -10.7751 | 1.964815 |
| H | -2.32553 | -9.27727 | 2.321351 |
| H | -2.48184 | -7.12595 | 1.079763 |

**Table S11.** Cartesian coordinates of the initial structure of equatorial-axial conformer of **1**.

| atom | <i>x</i> | <i>y</i> | <i>z</i> |
|------|----------|----------|----------|
| S    | -7.654   | -1.77057 | -1.78935 |
| S    | 9.202876 | -0.83293 | -0.09511 |
| N    | -0.10524 | 4.253314 | -0.26271 |
| N    | -0.02688 | 1.44769  | 0.029132 |
| N    | -6.14016 | -0.70099 | 0.536777 |
| N    | 6.202286 | -0.39874 | -0.0259  |
| C    | -1.22905 | 3.534164 | -0.14659 |
| C    | -2.49734 | 4.211304 | -0.17387 |
| C    | -3.65846 | 3.51485  | -0.05452 |
| C    | -3.67084 | 2.08022  | 0.105815 |
| C    | -4.88615 | 1.384342 | 0.235065 |
| C    | -4.92062 | -0.00456 | 0.395561 |
| C    | -3.68315 | -0.70246 | 0.392407 |
| C    | -2.4857  | -0.02798 | 0.266117 |
| C    | -2.43877 | 1.372596 | 0.129395 |

|   |          |          |          |
|---|----------|----------|----------|
| C | -1.19436 | 2.103908 | 0.004326 |
| C | 1.100397 | 2.161887 | -0.089   |
| C | 2.386516 | 1.482995 | -0.06846 |
| C | 2.486517 | 0.08324  | 0.067319 |
| C | 3.721823 | -0.53982 | 0.082526 |
| C | 4.9043   | 0.22351  | -0.03677 |
| C | 4.825014 | 1.599186 | -0.17039 |
| C | 3.575048 | 2.255691 | -0.19019 |
| C | 3.488134 | 3.686641 | -0.33285 |
| C | 2.287732 | 4.325471 | -0.35539 |
| C | 1.061163 | 3.586875 | -0.23527 |
| C | -7.39931 | -0.04942 | 0.344283 |
| C | -7.8598  | 0.932619 | 1.228839 |
| C | -9.08269 | 1.563432 | 1.002079 |
| C | -9.87375 | 1.189228 | -0.08728 |
| C | -9.4514  | 0.169549 | -0.93948 |
| C | -8.21457 | -0.44681 | -0.7274  |
| C | -6.87803 | -2.77135 | -0.52833 |
| C | -6.95944 | -4.16649 | -0.56732 |
| C | -6.3556  | -4.92515 | 0.434849 |
| C | -5.7087  | -4.29122 | 1.498827 |
| C | -5.64915 | -2.89902 | 1.552581 |
| C | -6.19917 | -2.13016 | 0.52039  |
| C | 6.684717 | -0.96813 | -1.23479 |
| C | 5.835116 | -1.21541 | -2.32504 |
| C | 6.329653 | -1.76393 | -3.50899 |
| C | 7.675319 | -2.10602 | -3.62559 |
| C | 8.529039 | -1.87537 | -2.54643 |
| C | 8.049531 | -1.2889  | -1.37424 |
| C | 8.146479 | -1.04719 | 1.323497 |
| C | 8.712435 | -1.41947 | 2.543724 |
| C | 7.940173 | -1.44759 | 3.70537  |
| C | 6.588083 | -1.12039 | 3.627022 |
| C | 6.006371 | -0.78733 | 2.40314  |
| C | 6.773274 | -0.74619 | 1.227645 |
| H | -2.48435 | 5.29024  | -0.29295 |
| H | -4.61272 | 4.035449 | -0.077   |
| H | -5.80583 | 1.954667 | 0.194652 |

|   |          |          |          |
|---|----------|----------|----------|
| H | -3.67075 | -1.78144 | 0.475292 |
| H | -1.55318 | -0.58186 | 0.263853 |
| H | 1.573571 | -0.4945  | 0.158016 |
| H | 3.793757 | -1.61863 | 0.185106 |
| H | 5.740039 | 2.177238 | -0.26176 |
| H | 4.413117 | 4.249891 | -0.42412 |
| H | 2.212719 | 5.403018 | -0.4636  |
| H | -7.2465  | 1.204078 | 2.082492 |
| H | -9.42314 | 2.336336 | 1.684869 |
| H | -10.831  | 1.672466 | -0.25968 |
| H | -10.0793 | -0.15606 | -1.76359 |
| H | -7.49927 | -4.65052 | -1.37584 |
| H | -6.41221 | -6.0091  | 0.396942 |
| H | -5.26279 | -4.87908 | 2.29571  |
| H | -5.1653  | -2.39691 | 2.384696 |
| H | 4.782891 | -0.96851 | -2.25354 |
| H | 5.647098 | -1.93157 | -4.33746 |
| H | 8.060788 | -2.5438  | -4.54149 |
| H | 9.583273 | -2.12917 | -2.61469 |
| H | 9.770139 | -1.66524 | 2.579794 |
| H | 8.393014 | -1.71853 | 4.654383 |
| H | 5.968261 | -1.13184 | 4.519254 |
| H | 4.950786 | -0.54762 | 2.365357 |

**Table S12.** Cartesian coordinates of the optimized structure of equatorial-axial conformer of **1**.

| atom | <i>x</i> | <i>y</i> | <i>z</i> |
|------|----------|----------|----------|
| S    | -7.55176 | -1.74085 | -1.80972 |
| S    | 9.197853 | -0.87637 | -0.09145 |
| N    | -0.12697 | 4.251893 | -0.28345 |
| N    | -0.03682 | 1.451584 | 0.032917 |
| N    | -6.14304 | -0.71499 | 0.607164 |
| N    | 6.203205 | -0.37342 | -0.0282  |
| C    | -1.24834 | 3.531665 | -0.15496 |
| C    | -2.51937 | 4.205242 | -0.18141 |
| C    | -3.67819 | 3.505116 | -0.04822 |
| C    | -3.68416 | 2.071031 | 0.125965 |
| C    | -4.89769 | 1.371488 | 0.269859 |
| C    | -4.9253  | -0.01613 | 0.442303 |

|   |          |          |          |
|---|----------|----------|----------|
| C | -3.68609 | -0.71105 | 0.43976  |
| C | -2.49044 | -0.03307 | 0.299275 |
| C | -2.44955 | 1.367251 | 0.148575 |
| C | -1.20718 | 2.102161 | 0.008723 |
| C | 1.087825 | 2.167707 | -0.09702 |
| C | 2.377613 | 1.493678 | -0.076   |
| C | 2.48464  | 0.094271 | 0.071856 |
| C | 3.723699 | -0.52337 | 0.088345 |
| C | 4.902432 | 0.244254 | -0.04147 |
| C | 4.816932 | 1.618324 | -0.18755 |
| C | 3.562801 | 2.2702   | -0.20924 |
| C | 3.469843 | 3.700425 | -0.36514 |
| C | 2.265968 | 4.33543  | -0.38878 |
| C | 1.042822 | 3.59217  | -0.256   |
| C | -7.39913 | -0.06928 | 0.374156 |
| C | -7.90103 | 0.890966 | 1.26033  |
| C | -9.11552 | 1.524988 | 0.994708 |
| C | -9.85448 | 1.17596  | -0.14071 |
| C | -9.39027 | 0.17782  | -0.99826 |
| C | -8.16158 | -0.44294 | -0.7444  |
| C | -6.81745 | -2.76386 | -0.54262 |
| C | -6.87923 | -4.16005 | -0.62081 |
| C | -6.312   | -4.93812 | 0.389277 |
| C | -5.72204 | -4.32483 | 1.499488 |
| C | -5.68077 | -2.93284 | 1.589402 |
| C | -6.19385 | -2.14432 | 0.552835 |
| C | 6.676889 | -0.95972 | -1.23293 |
| C | 5.825595 | -1.18604 | -2.32802 |
| C | 6.310213 | -1.75178 | -3.5095  |
| C | 7.64776  | -2.13044 | -3.61898 |
| C | 8.503049 | -1.91737 | -2.53587 |
| C | 8.034896 | -1.31407 | -1.36627 |
| C | 8.135272 | -1.05306 | 1.325939 |
| C | 8.693219 | -1.42479 | 2.551317 |
| C | 7.923366 | -1.41644 | 3.716372 |
| C | 6.580108 | -1.05094 | 3.636777 |
| C | 6.00477  | -0.7184  | 2.408246 |
| C | 6.769063 | -0.71832 | 1.228824 |

|   |          |          |          |
|---|----------|----------|----------|
| H | -2.51056 | 5.282778 | -0.31055 |
| H | -4.63355 | 4.023029 | -0.07018 |
| H | -5.81955 | 1.93811  | 0.232224 |
| H | -3.66929 | -1.78883 | 0.534124 |
| H | -1.5564  | -0.5836  | 0.297383 |
| H | 1.574903 | -0.48665 | 0.171133 |
| H | 3.800178 | -1.60067 | 0.200259 |
| H | 5.729975 | 2.197954 | -0.28705 |
| H | 4.39141  | 4.26716  | -0.46561 |
| H | 2.186002 | 5.411339 | -0.50663 |
| H | -7.32483 | 1.142503 | 2.145161 |
| H | -9.48976 | 2.280133 | 1.679092 |
| H | -10.8042 | 1.660897 | -0.34484 |
| H | -9.97975 | -0.1287  | -1.857   |
| H | -7.3765  | -4.62948 | -1.46414 |
| H | -6.3541  | -6.02091 | 0.321364 |
| H | -5.30611 | -4.9286  | 2.300174 |
| H | -5.23951 | -2.44488 | 2.45277  |
| H | 4.780998 | -0.90867 | -2.2647  |
| H | 5.627541 | -1.90187 | -4.34057 |
| H | 8.025261 | -2.58199 | -4.53093 |
| H | 9.550127 | -2.19898 | -2.59883 |
| H | 9.743361 | -1.69946 | 2.588402 |
| H | 8.370676 | -1.68807 | 4.667245 |
| H | 5.963281 | -1.0299  | 4.530301 |
| H | 4.957597 | -0.44614 | 2.372039 |

**Table S13.** Cartesian coordinates of the initial structure of equatorial-equatorial conformer of **1**.

| atom | <i>x</i> | <i>y</i> | <i>z</i> |
|------|----------|----------|----------|
| N    | 0.06101  | 4.307628 | 0        |
| N    | 0.017664 | 1.490045 | 0        |
| C    | 0.062068 | 4.327549 | -2.3953  |
| C    | 0.05258  | 3.65402  | -3.57761 |
| C    | 0.030659 | 2.212679 | -3.62621 |
| C    | 0.021447 | 1.525146 | -4.86065 |
| C    | 0.000237 | 0.141051 | -4.90403 |
| C    | -0.01224 | -0.59888 | -3.70111 |
| C    | -0.00338 | 0.054197 | -2.48009 |



|   |          |          |          |
|---|----------|----------|----------|
| C | 0.01807  | 1.463438 | -2.41688 |
| C | 0.028289 | 2.177248 | -1.14852 |
| C | 0.050408 | 3.613245 | -1.14732 |
| C | 0.062068 | 4.327549 | 2.395303 |
| C | 0.05258  | 3.65402  | 3.577607 |
| C | 0.030659 | 2.212679 | 3.626206 |
| C | 0.021447 | 1.525146 | 4.860647 |
| C | 0.000237 | 0.141051 | 4.904026 |
| C | -0.01224 | -0.59888 | 3.701114 |
| C | -0.00338 | 0.054197 | 2.480089 |
| C | 0.01807  | 1.463438 | 2.416878 |
| C | 0.028289 | 2.177248 | 1.148522 |
| C | 0.050408 | 3.613245 | 1.147325 |
| H | 0.078799 | 5.411603 | -2.35056 |
| H | 0.061632 | 4.19853  | -4.51783 |
| H | 0.031143 | 2.083783 | -5.79193 |
| H | -0.02847 | -1.68358 | -3.74469 |
| H | -0.01262 | -0.50714 | -1.5529  |
| H | 0.078799 | 5.411603 | 2.350558 |
| H | 0.061632 | 4.19853  | 4.517826 |
| H | 0.031143 | 2.083783 | 5.791929 |
| H | -0.02847 | -1.68358 | 3.744694 |
| H | -0.01262 | -0.50714 | 1.5529   |
| C | 1.223791 | -1.01512 | -6.68884 |
| C | -1.25199 | -0.97598 | -6.69431 |
| C | 2.362706 | -1.13165 | -5.87408 |
| C | -2.39779 | -1.05627 | -5.88481 |
| C | 3.566868 | -1.61763 | -6.38875 |
| H | 2.316222 | -0.83142 | -4.83494 |
| C | 2.531643 | -1.9179  | -8.53872 |
| C | -3.61448 | -1.5035  | -6.40511 |
| H | -2.34659 | -0.75766 | -4.84543 |
| C | -2.57953 | -1.83645 | -8.55038 |
| C | 3.657622 | -2.02343 | -7.71959 |
| H | 4.431006 | -1.68437 | -5.73452 |
| H | 2.579286 | -2.22238 | -9.58014 |
| C | -3.71203 | -1.90612 | -7.73644 |
| H | -4.48332 | -1.54263 | -5.75488 |

|   |          |          |          |
|---|----------|----------|----------|
| H | -2.63211 | -2.13914 | -9.59209 |
| H | 4.587934 | -2.41378 | -8.11974 |
| H | -4.65247 | -2.26657 | -8.14094 |
| N | -0.00758 | -0.51332 | -6.18561 |
| C | -1.25199 | -0.97598 | 6.694313 |
| C | 1.223791 | -1.01512 | 6.68884  |
| C | -2.39779 | -1.05627 | 5.884809 |
| C | 2.362706 | -1.13165 | 5.874083 |
| C | -3.61448 | -1.5035  | 6.405111 |
| H | -2.34659 | -0.75766 | 4.845431 |
| C | -2.57953 | -1.83645 | 8.550378 |
| C | 3.566868 | -1.61763 | 6.388745 |
| H | 2.316222 | -0.83142 | 4.834936 |
| C | 2.531643 | -1.9179  | 8.538719 |
| C | -3.71203 | -1.90612 | 7.73644  |
| H | -4.48332 | -1.54263 | 5.754884 |
| H | -2.63211 | -2.13914 | 9.592086 |
| C | 3.657622 | -2.02343 | 7.719592 |
| H | 4.431006 | -1.68437 | 5.734516 |
| H | 2.579286 | -2.22238 | 9.580142 |
| H | -4.65247 | -2.26657 | 8.140937 |
| H | 4.587934 | -2.41378 | 8.119741 |
| N | -0.00758 | -0.51332 | 6.185606 |
| C | 1.335854 | -1.39386 | -8.04208 |
| C | -1.36991 | -1.35088 | -8.04816 |
| S | -0.00996 | -1.08682 | -9.16615 |
| C | -1.36991 | -1.35088 | 8.048162 |
| C | 1.335854 | -1.39386 | 8.042083 |
| S | -0.00996 | -1.08682 | 9.166151 |

**Table S14.** Cartesian coordinates of the optimized structure of equatorial-equatorial conformer of **1**.

| atom | <i>x</i> | <i>y</i> | <i>z</i> |
|------|----------|----------|----------|
| N    | -4.30808 | 0.002601 | 0        |
| N    | -1.49014 | 0.000735 | 0        |
| C    | -4.32797 | 0.002661 | 2.395281 |
| C    | -3.65443 | 0.002272 | 3.577618 |
| C    | -2.21291 | 0.001331 | 3.626233 |
| C    | -1.52531 | 0.000959 | 4.860656 |

|   |          |          |          |
|---|----------|----------|----------|
| C | -0.14107 | 0.000036 | 4.904038 |
| C | 0.599002 | -0.00054 | 3.701152 |
| C | -0.05413 | -0.00017 | 2.48011  |
| C | -1.46354 | 0.000766 | 2.416894 |
| C | -2.17743 | 0.001196 | 1.148524 |
| C | -3.61358 | 0.002148 | 1.14731  |
| C | -4.32797 | 0.002661 | -2.39528 |
| C | -3.65443 | 0.002272 | -3.57762 |
| C | -2.21291 | 0.001331 | -3.62623 |
| C | -1.52531 | 0.000959 | -4.86066 |
| C | -0.14107 | 0.000036 | -4.90404 |
| C | 0.599002 | -0.00054 | -3.70115 |
| C | -0.05413 | -0.00017 | -2.48011 |
| C | -1.46354 | 0.000766 | -2.41689 |
| C | -2.17743 | 0.001196 | -1.14852 |
| C | -3.61358 | 0.002148 | -1.14731 |
| H | -5.41215 | 0.003379 | 2.350557 |
| H | -4.19899 | 0.002673 | 4.51785  |
| H | -2.08403 | 0.001395 | 5.791947 |
| H | 1.683815 | -0.00126 | 3.744801 |
| H | 0.507311 | -0.00059 | 1.552941 |
| H | -5.41215 | 0.003379 | -2.35056 |
| H | -4.19899 | 0.002673 | -4.51785 |
| H | -2.08403 | 0.001395 | -5.79195 |
| H | 1.683815 | -0.00126 | -3.7448  |
| H | 0.507311 | -0.00059 | -1.55294 |
| C | 0.994729 | -1.23866 | 6.691645 |
| C | 0.996418 | 1.237482 | 6.691458 |
| C | 1.092367 | -2.38126 | 5.879536 |
| C | 1.095604 | 2.379835 | 5.879188 |
| C | 1.557896 | -3.59226 | 6.39708  |
| H | 0.793079 | -2.33216 | 4.840242 |
| C | 1.875235 | -2.55724 | 8.544694 |
| C | 1.5628   | 3.590274 | 6.39655  |
| H | 0.796239 | 2.331    | 4.839906 |
| C | 1.878743 | 2.555129 | 8.544308 |
| C | 1.961838 | -3.68676 | 7.728222 |
| H | 1.610103 | -4.45894 | 5.744906 |

|   |          |          |          |
|---|----------|----------|----------|
| H | 2.178775 | -2.60755 | 9.586264 |
| C | 1.966886 | 3.684409 | 7.727673 |
| H | 1.616186 | 4.456792 | 5.744251 |
| H | 2.182358 | 2.605182 | 9.58587  |
| H | 2.336332 | -4.62259 | 8.130644 |
| H | 2.342664 | 4.619784 | 8.129957 |
| N | 0.513385 | -0.0003  | 6.1856   |
| C | 0.996418 | 1.237482 | -6.69146 |
| C | 0.994729 | -1.23866 | -6.69165 |
| C | 1.095604 | 2.379835 | -5.87919 |
| C | 1.092367 | -2.38126 | -5.87954 |
| C | 1.5628   | 3.590274 | -6.39655 |
| H | 0.796239 | 2.331    | -4.83991 |
| C | 1.878743 | 2.555129 | -8.54431 |
| C | 1.557896 | -3.59226 | -6.39708 |
| H | 0.793079 | -2.33216 | -4.84024 |
| C | 1.875235 | -2.55724 | -8.54469 |
| C | 1.966886 | 3.684409 | -7.72767 |
| H | 1.616186 | 4.456792 | -5.74425 |
| H | 2.182358 | 2.605182 | -9.58587 |
| C | 1.961838 | -3.68676 | -7.72822 |
| H | 1.610103 | -4.45894 | -5.74491 |
| H | 2.178775 | -2.60755 | -9.58626 |
| H | 2.342664 | 4.619784 | -8.12996 |
| H | 2.336332 | -4.62259 | -8.13064 |
| N | 0.513385 | -0.0003  | -6.1856  |
| C | 1.371825 | -1.35386 | 8.045097 |
| C | 1.373679 | 1.352371 | 8.044892 |
| S | 1.088027 | -0.00047 | 9.166195 |
| C | 1.373679 | 1.352371 | -8.04489 |
| C | 1.371825 | -1.35386 | -8.0451  |
| S | 1.088027 | -0.00047 | -9.1662  |

---

**Table S15.** Selected excitation energies and oscillator strength ( $f$ ) of the conformers of **1**.<sup>a</sup>

|                        | Axial-Axial ( <i>syn</i> ) | Axial-Axial ( <i>anti</i> ) | Equatorial-Axial | Equatorial-Equatorial |
|------------------------|----------------------------|-----------------------------|------------------|-----------------------|
| $\lambda$ [nm] ( $f$ ) | 439.04 (0.5653)            | 439.84 (0.5688)             | 538.22 (0.0001)  | 596.35 (0)            |
| <i>transition mode</i> | H→L (95%)                  | H→L (95%)                   | H→L (99%)        | H→L (99%)             |
| $\lambda$ [nm] ( $f$ ) | 354.80 (0.1493)            | 355.13 (0.1599)             | 449.23 (0.3059)  | 389.79 (0.3807)       |
| <i>transition mode</i> | H-2→L (48%)                | H-2→L (46%)                 | H-1→L (97%)      | H-4→L (90%)           |
| $\lambda$ [nm] ( $f$ ) | 339.81 (0.6522)            | 340.28 (0.6491)             | 348.29 (0.5908)  | 377.05 (0.0214)       |
| <i>transition mode</i> | H-1→L+1 (37%)              | H-1→L+1 (36%)               | H-1→L+1 (66%)    | H-5→L (94%)           |
| $\lambda$ [nm] ( $f$ ) | 338.43 (0.1207)            | 338.79 (0.1211)             | 305.77 (0.1559)  | 317.19 (0.0216)       |
| <i>transition mode</i> | H-3→L (50%)                | H-3→L (50%)                 | H-1→L+5 (22%)    | H-6→L (50%)           |
| $\lambda$ [nm] ( $f$ ) |                            |                             |                  | 315.23 (0.0255)       |
| <i>transition mode</i> |                            |                             |                  | H-11→L (57%)          |

<sup>a</sup> The coefficient percentages of orbitals involved in the transitions are shown in parentheses.

### Time-resolved photoluminescence analysis

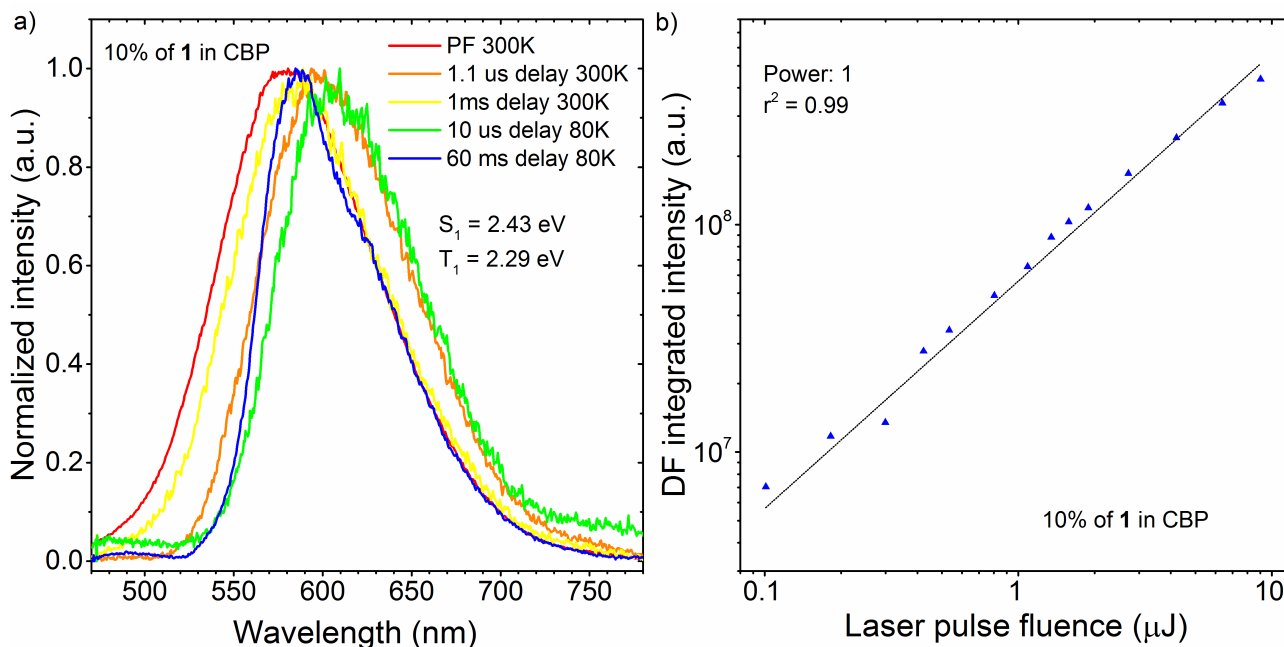

**Figure S11.** Emission spectra recorded at different delay time for 10% **1**: CBP blend. Power dependence of delayed fluorescence from 10% **1**: CBP blend. Recorded at 300K.

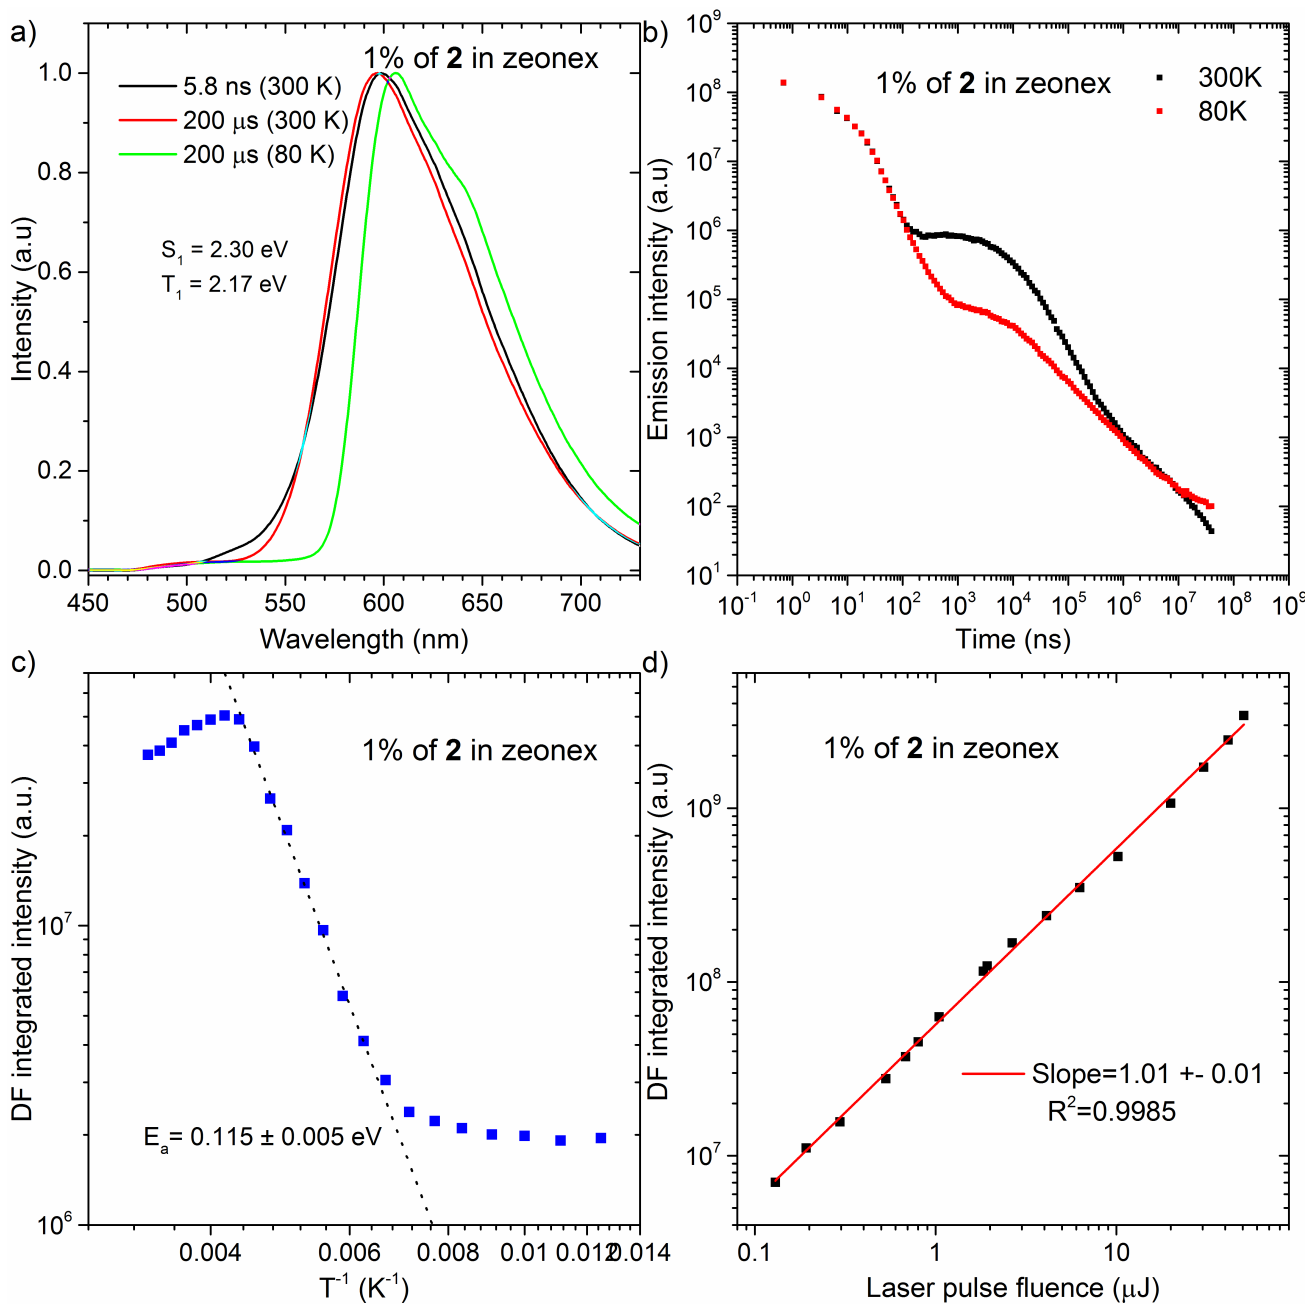

**Figure S12.** (a) PF, DF and PH spectra of 1 wt% 2:zeonex<sup>®</sup> blended film. (b) Transient decays of 1 wt% 2:zeonex<sup>®</sup> blended film at 300K and 80K. (c) Temperature dependence of delayed fluorescence of 1 wt% 2:zeonex<sup>®</sup> blended film. (d) Power dependence of delayed fluorescence of 1 wt% 2:zeonex<sup>®</sup> blended film at 300K.

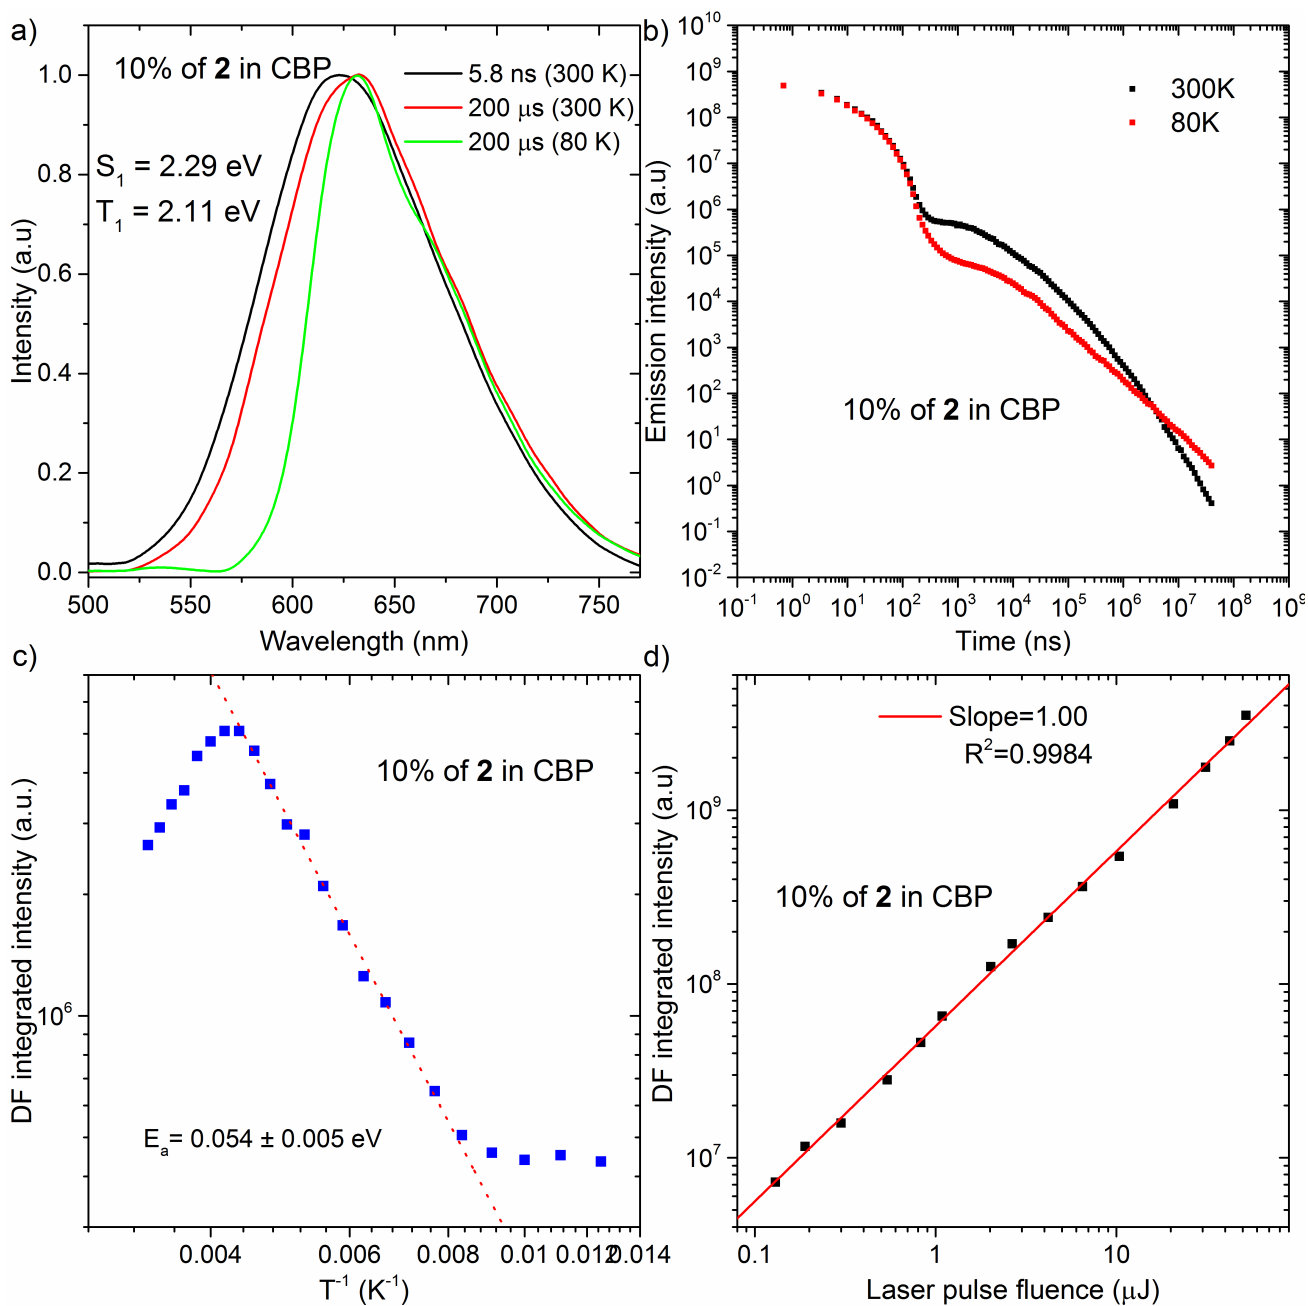

**Figure S13.** (a) PF, DF and PH spectra of 10 wt% 2:CBP blended film. (b) Transient decays of 10 wt% 2:CBP blended film at 300K and 80K. (c) Temperature dependence of delayed fluorescence of 10 wt% 2:CBP blended film. (d) Power dependence of delayed fluorescence of 10 wt% 2:CBP blended film at 300K.

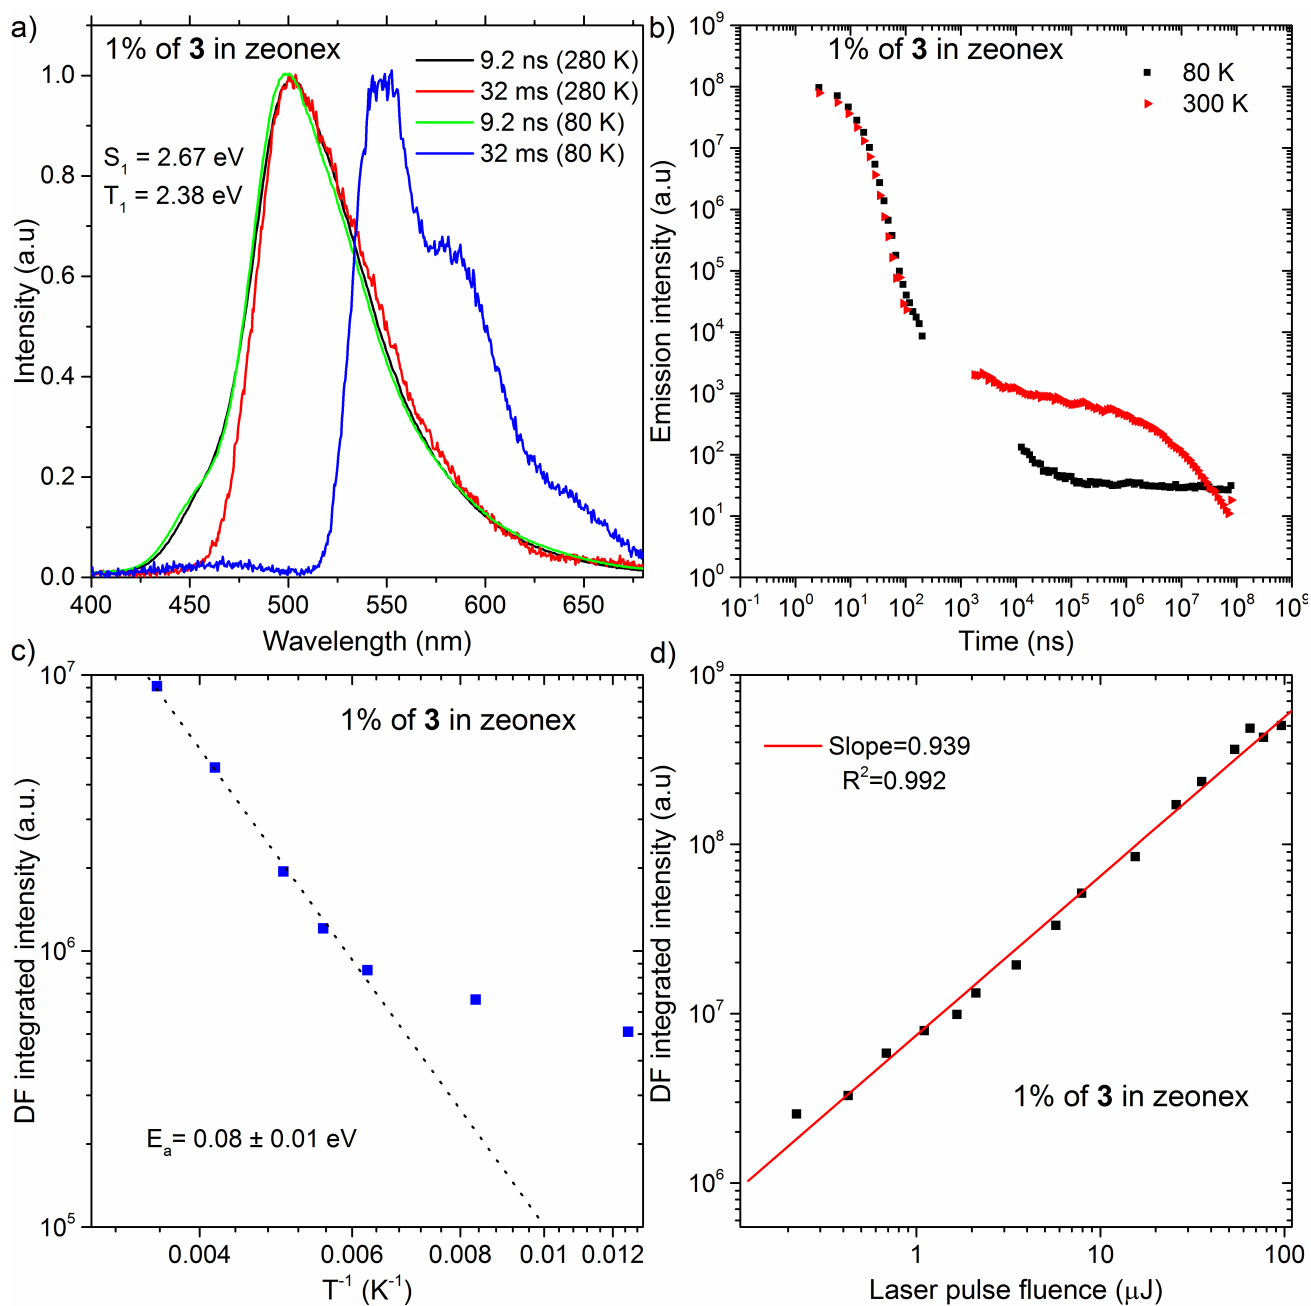

**Figure S14.** (a) PF, DF and PH spectra of 1 wt% **3**:zeonex<sup>®</sup> blended film. (b) Transient decays of 1 wt% **3**:zeonex<sup>®</sup> blended film at 300K and 80K. (c) Temperature dependence of delayed fluorescence of 1 wt% **3**:zeonex<sup>®</sup> blended film. (d) Power dependence of delayed fluorescence of 1 wt% **3**:zeonex<sup>®</sup> blended film at 300K.



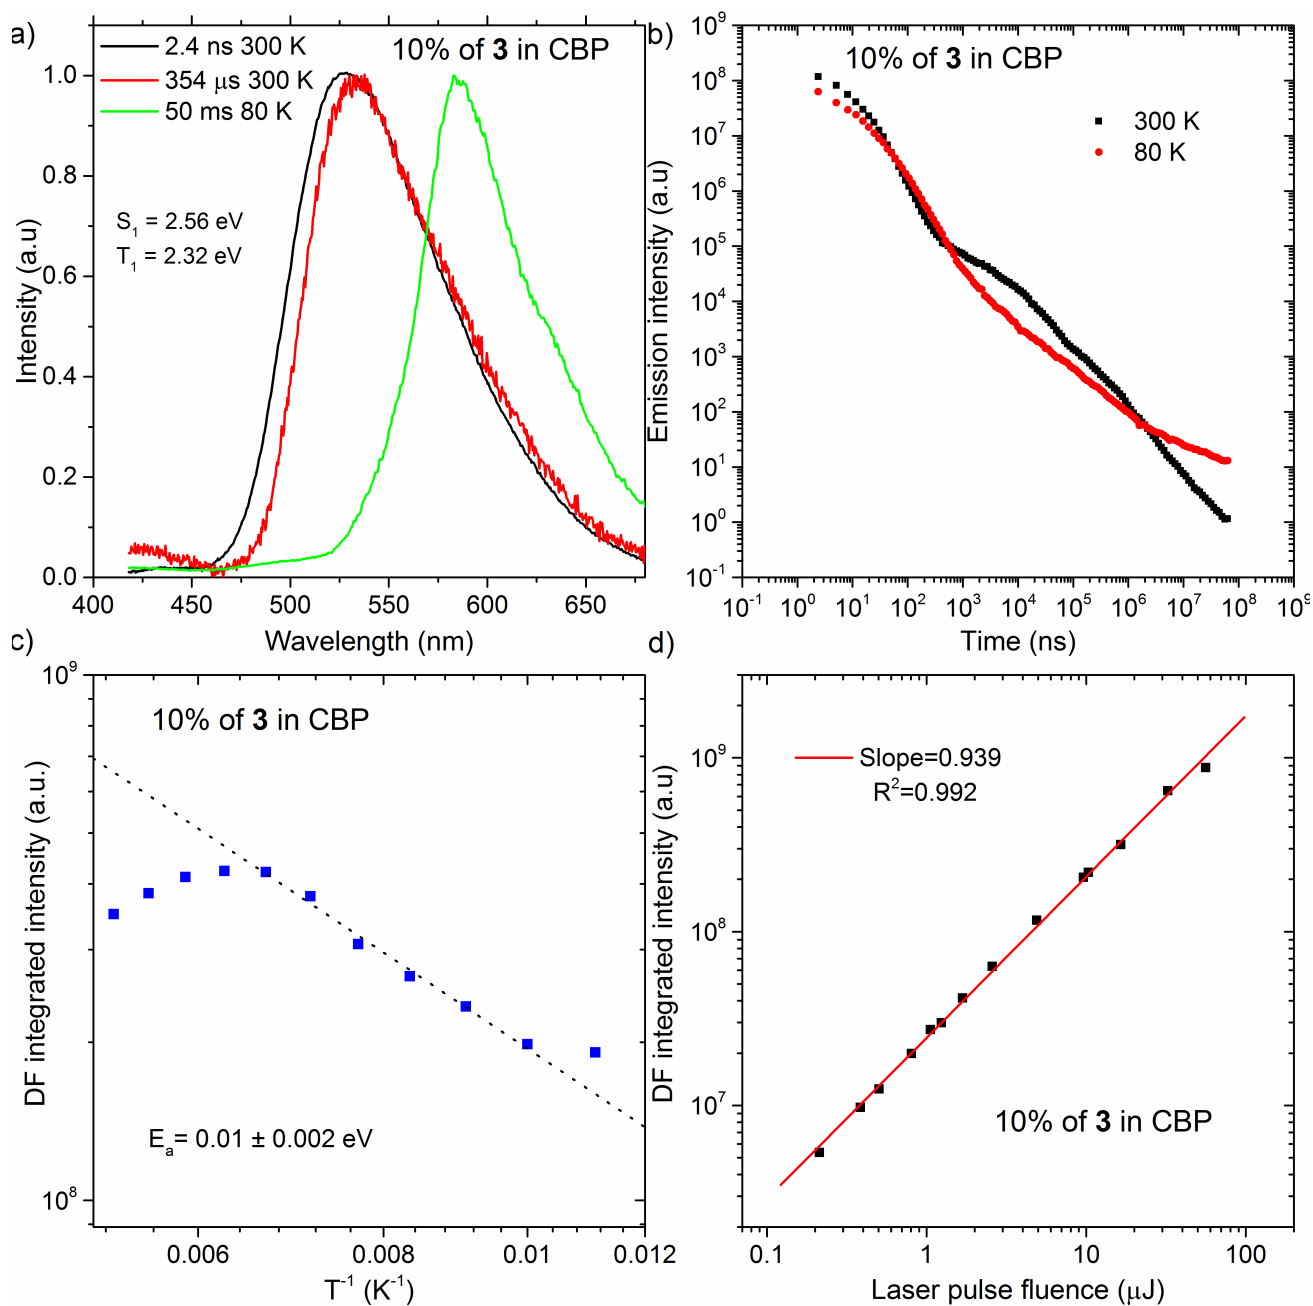

**Figure S15.** (a) PF, DF and PH spectra of 10 wt% 3:CBP blended film. (b) Transient decays of 10 wt% 3:CBP blended film at 300K and 80K. (c) Temperature dependence of delayed fluorescence of 10 wt% 3:CBP blended film. (d) Power dependence of delayed fluorescence of 10 wt% 3:CBP blended film at 300K.

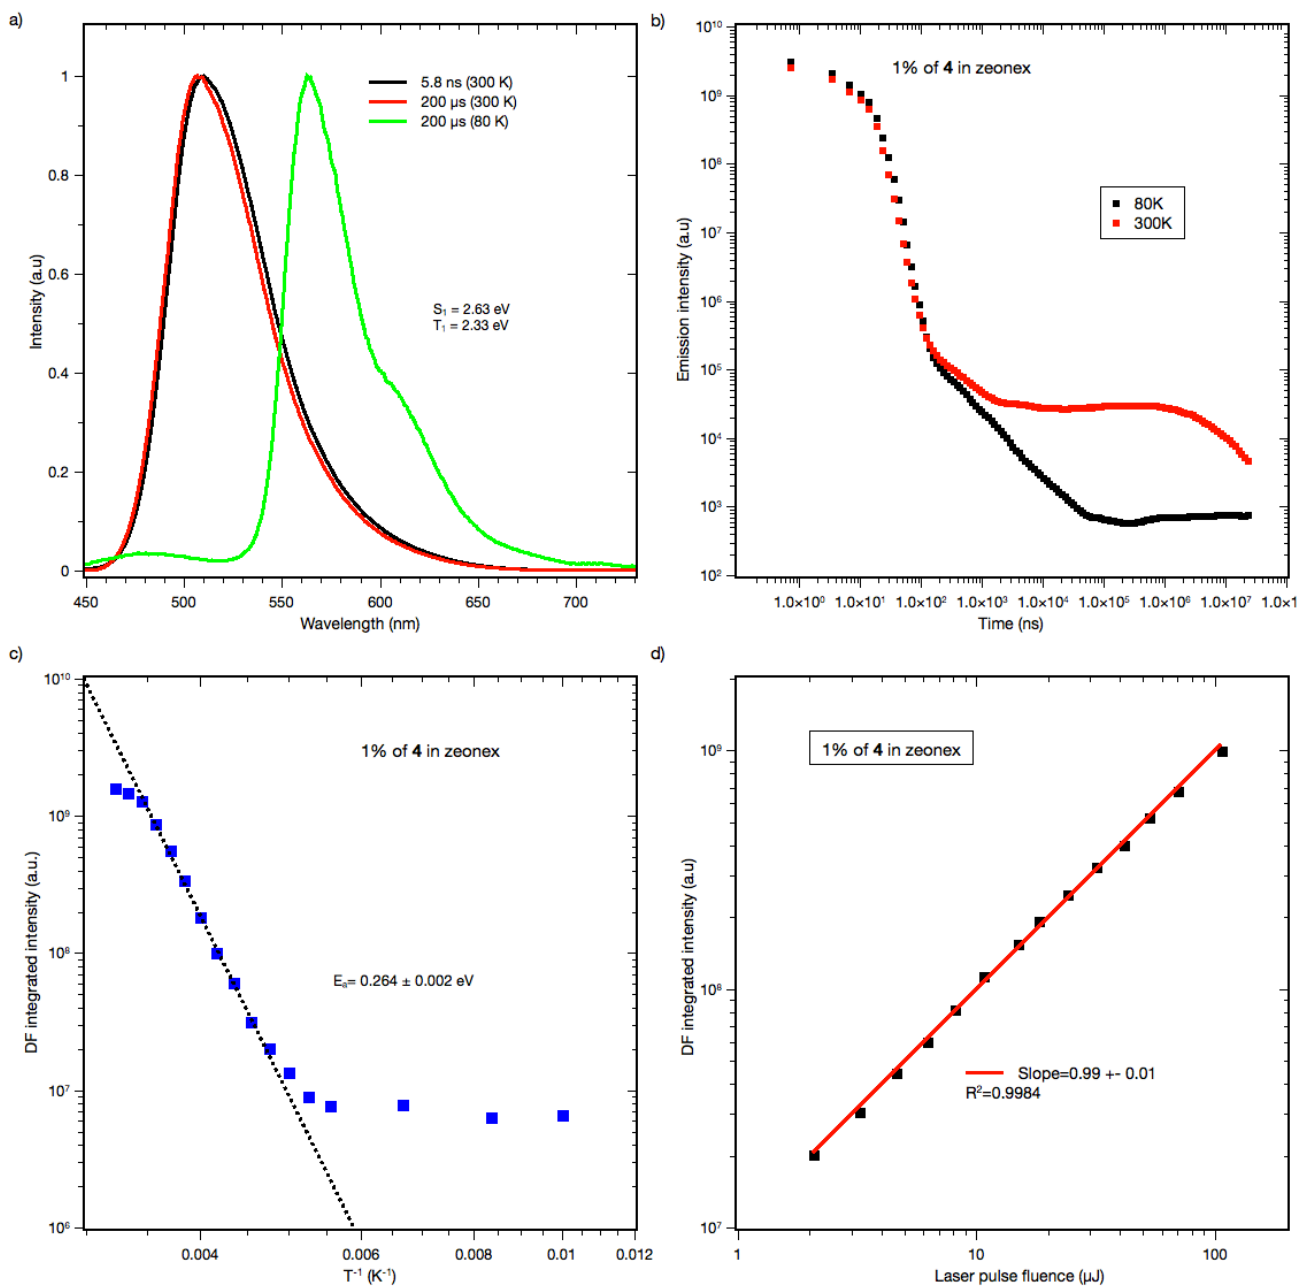

**Figure S16.** (a) PF, DF and PH spectra of 1 wt% 4:zeonex<sup>®</sup> blended film. (b) Transient decays of 1 wt% 4:zeonex<sup>®</sup> blended film at 300K and 80K. (c) Temperature dependence of delayed fluorescence of 1 wt% 4:zeonex<sup>®</sup> blended film. (d) Power dependence of delayed fluorescence of 1 wt% 4:zeonex<sup>®</sup> blended film at 300K.

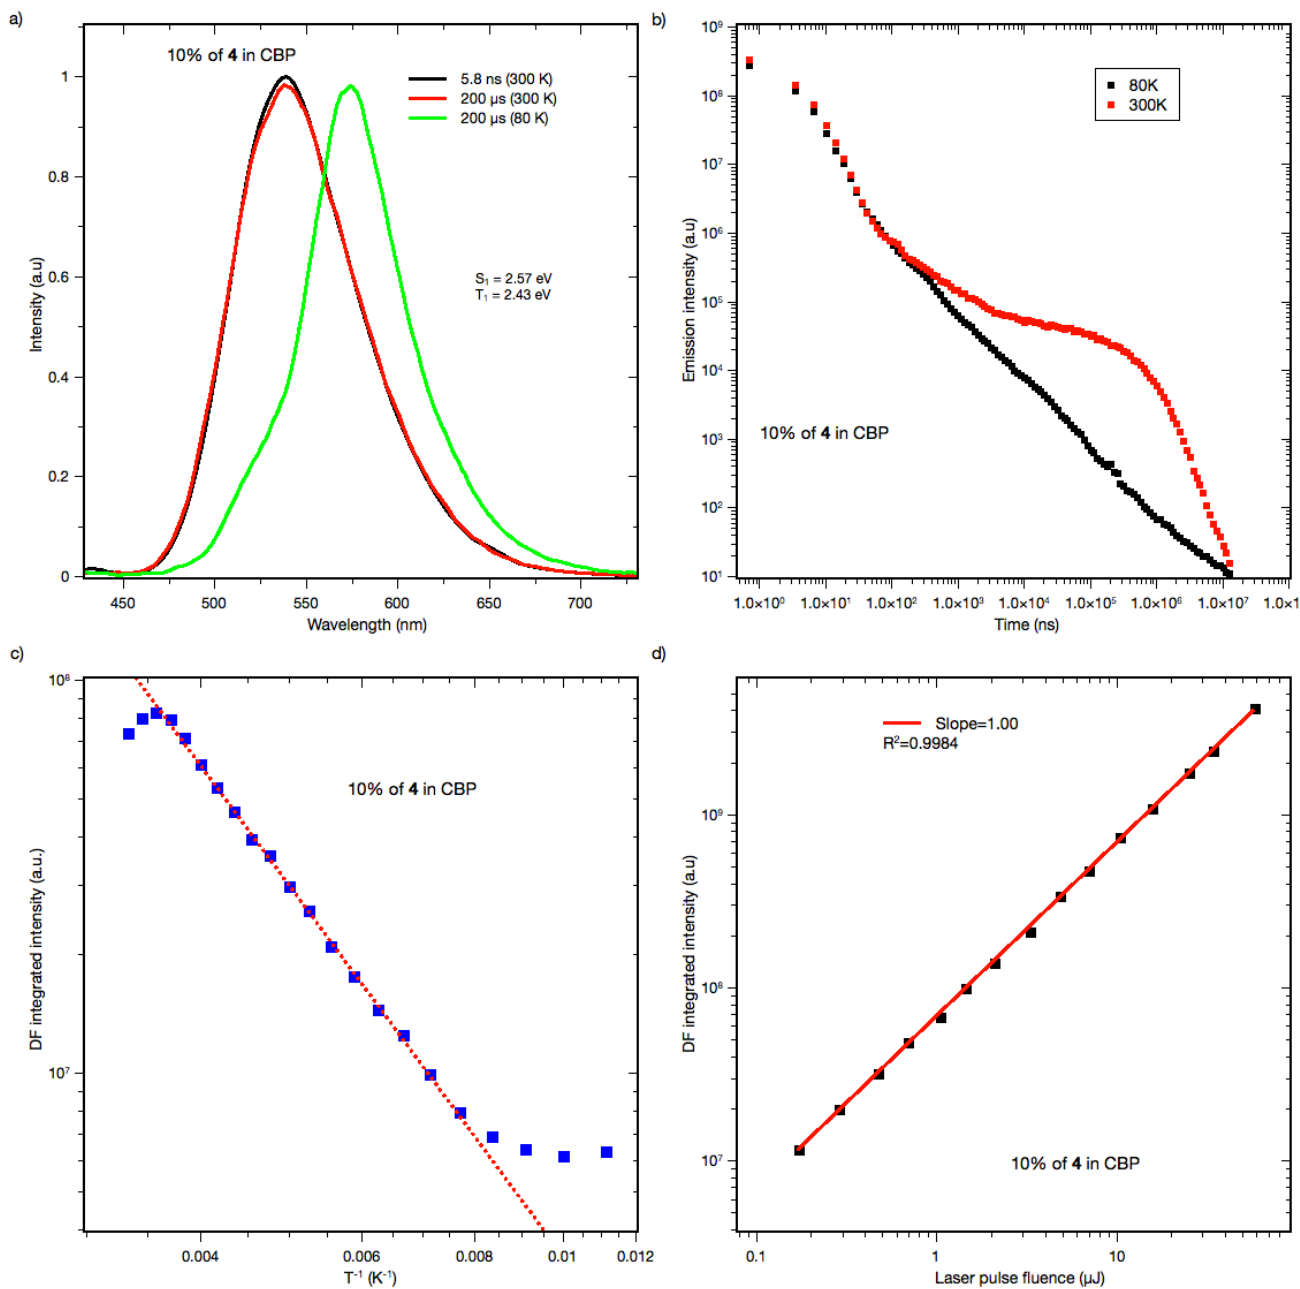

**Figure S17.** (a) PF, DF and PH spectra of 10 wt% 4:CBP blended film. (b) Transient decays of 10 wt% 4:CBP blended film at 300K and 80K. (c) Temperature dependence of delayed fluorescence of 10 wt% 4:CBP blended film. (d) Power dependence of delayed fluorescence of 10 wt% 4:CBP blended film at 300K.

## Thermogravimetric Analysis (TGA)

The TGA profiles of solid samples 1–4 were recorded under the N<sub>2</sub> gas flow (200 mL/min), starting from 40 °C to 800 °C at the ramp rate of 10 °C/min.

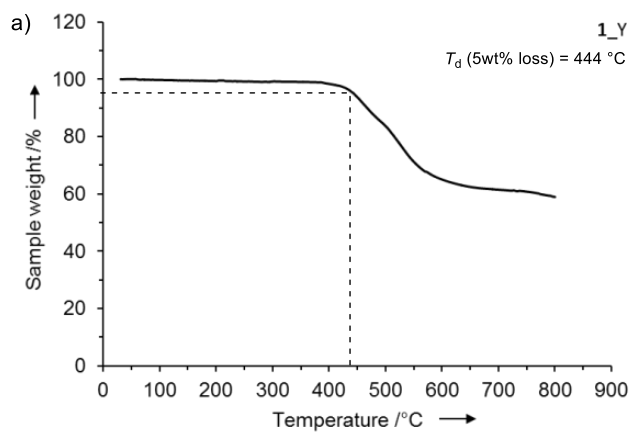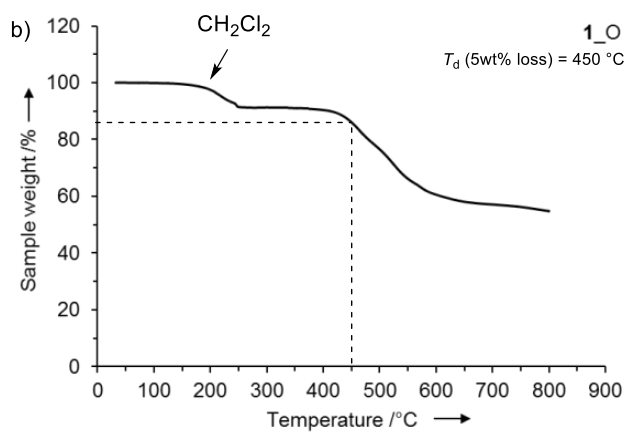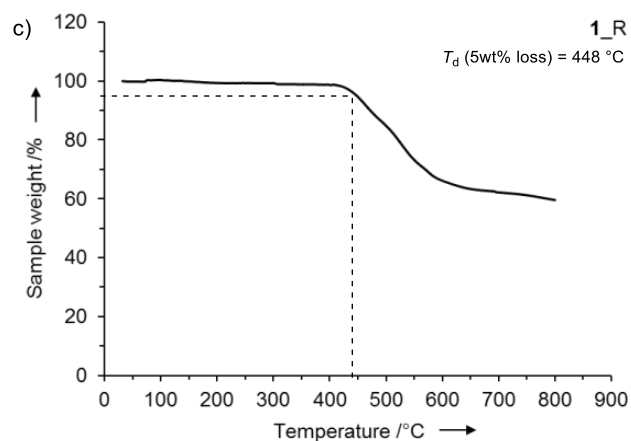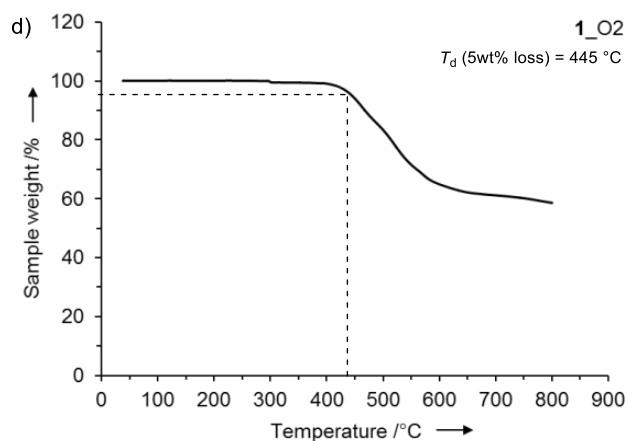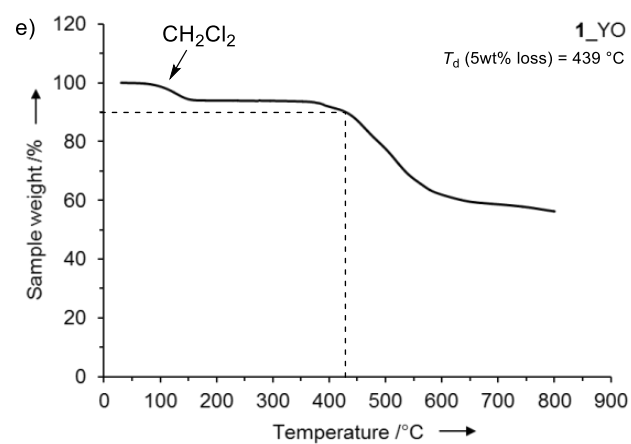

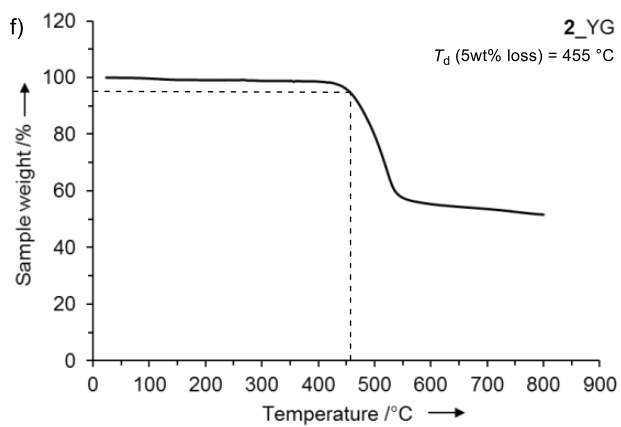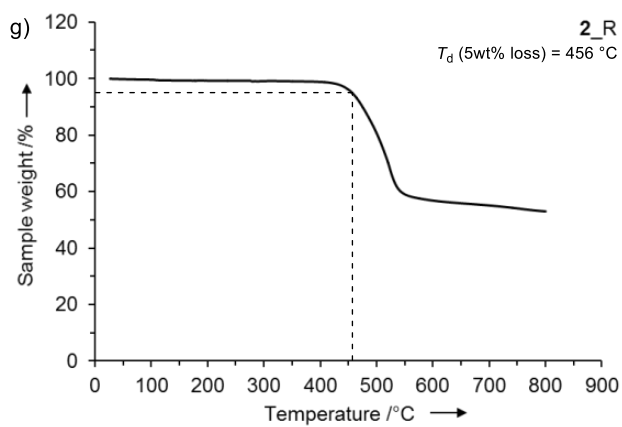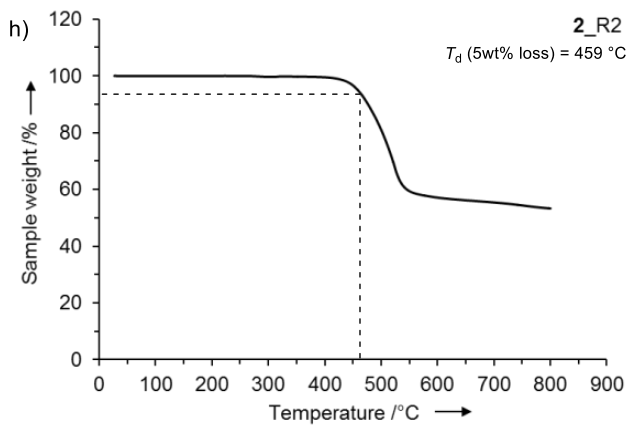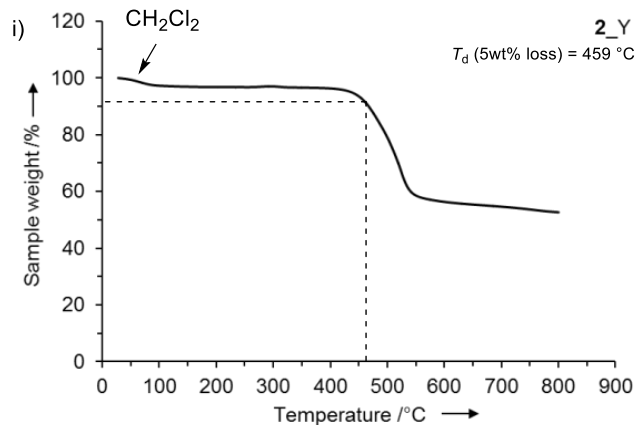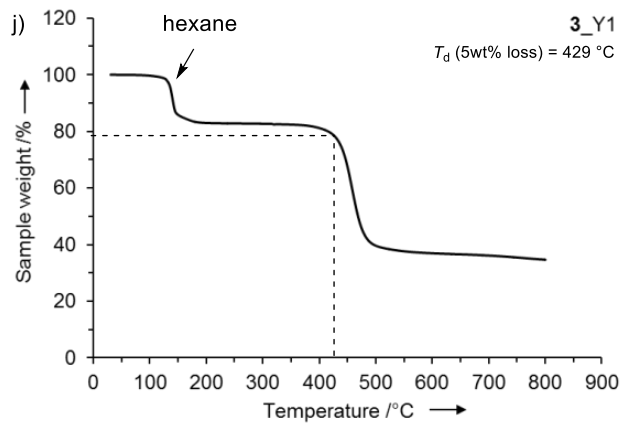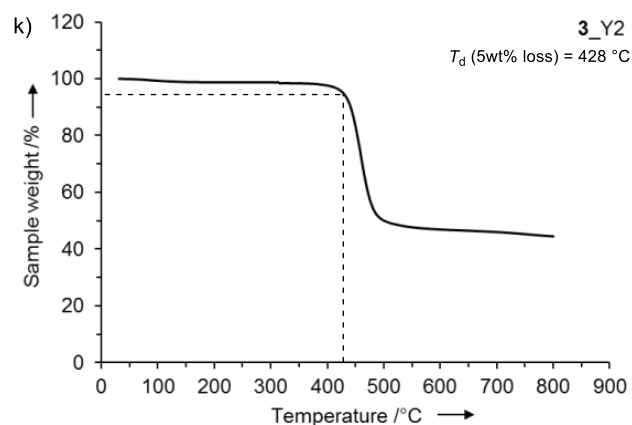

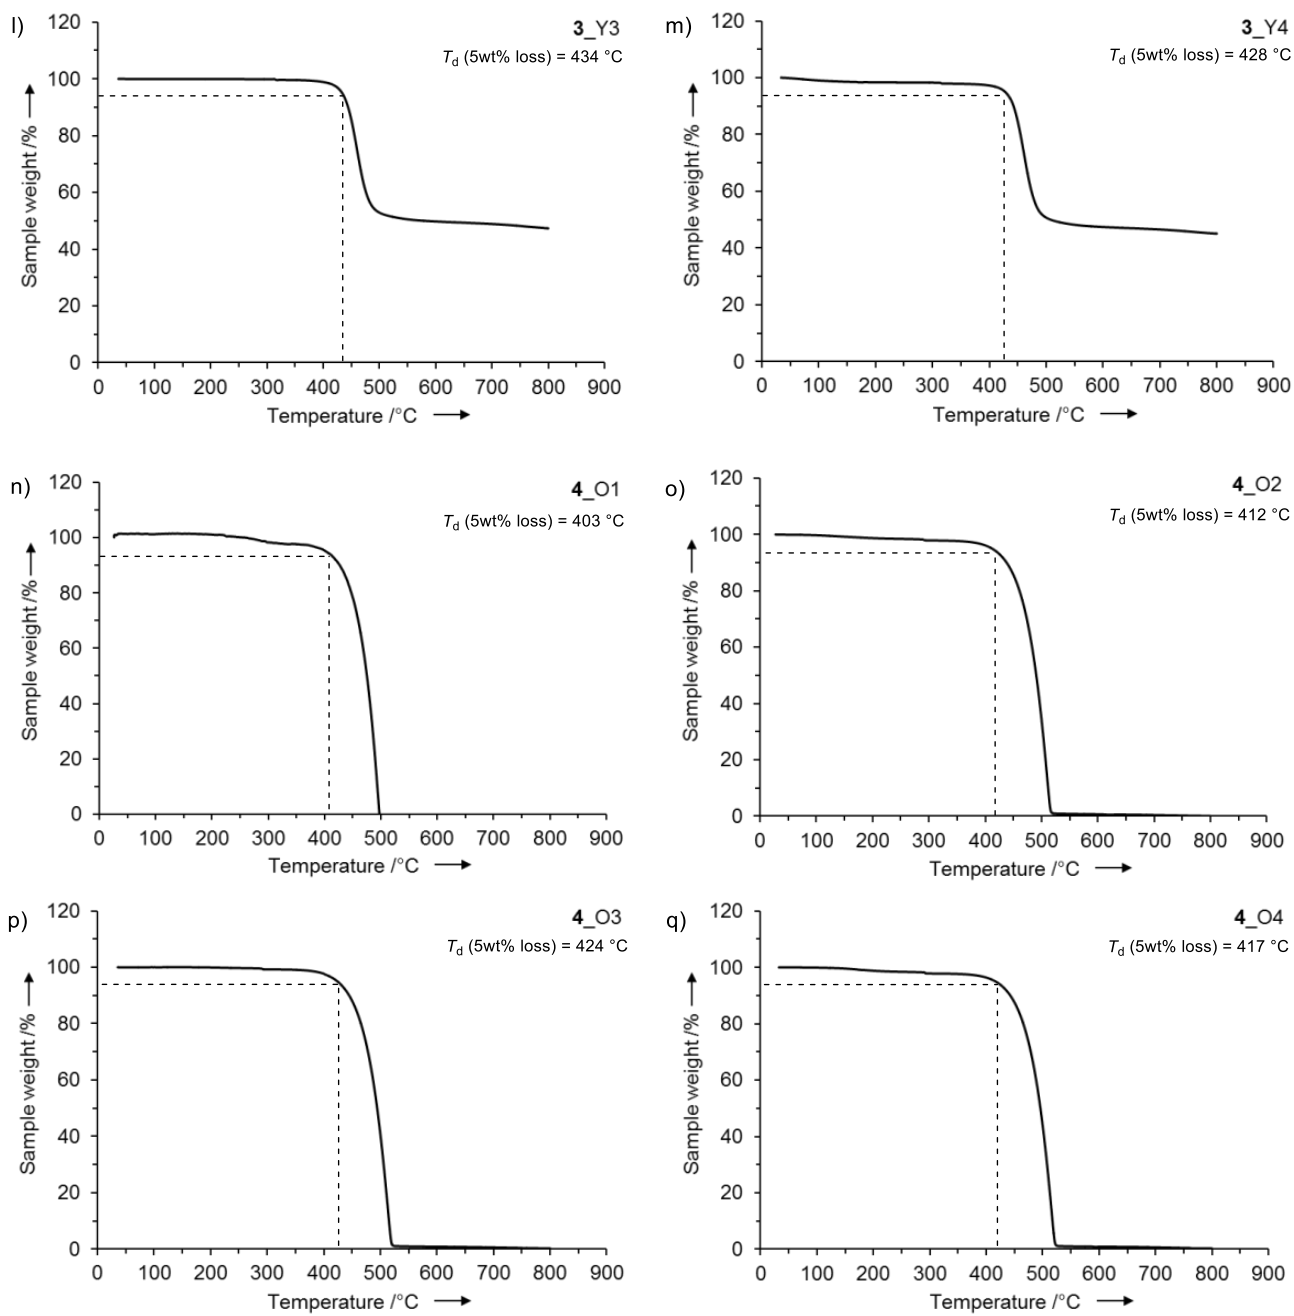

**Figure S18.** TGA profiles of 1–4.

## Cyclic Voltammograms

CV experiments were conducted at room temperature using degassed  $\text{CH}_2\text{Cl}_2$  solutions of **1–4** (concentration:  $1.0 \times 10^{-3}$  M) containing 0.1 M  $n\text{-Bu}_4\text{PF}_6$  as a supporting electrolyte in a cell equipped with a Pt as the working electrode (scanning rate: 100 mV/s). A Pt and Ag wires were applied as the counter and the reference electrode, respectively. The HOMO/LUMO energy levels were calculated by the following equation using the onset potentials corrected against the  $\text{Fc}/\text{Fc}^+$  ( $\text{Fc}$  = ferrocene) couple:  $E_{\text{HOMO}} = -(5.1 + {}^{\text{ox}}E_{\text{onset}})$  [eV];  $E_{\text{LUMO}} = -(5.1 + {}^{\text{red}}E_{\text{onset}} \text{ vs. } \text{Fc}/\text{Fc}^+)$  [eV].<sup>S9–S12</sup>

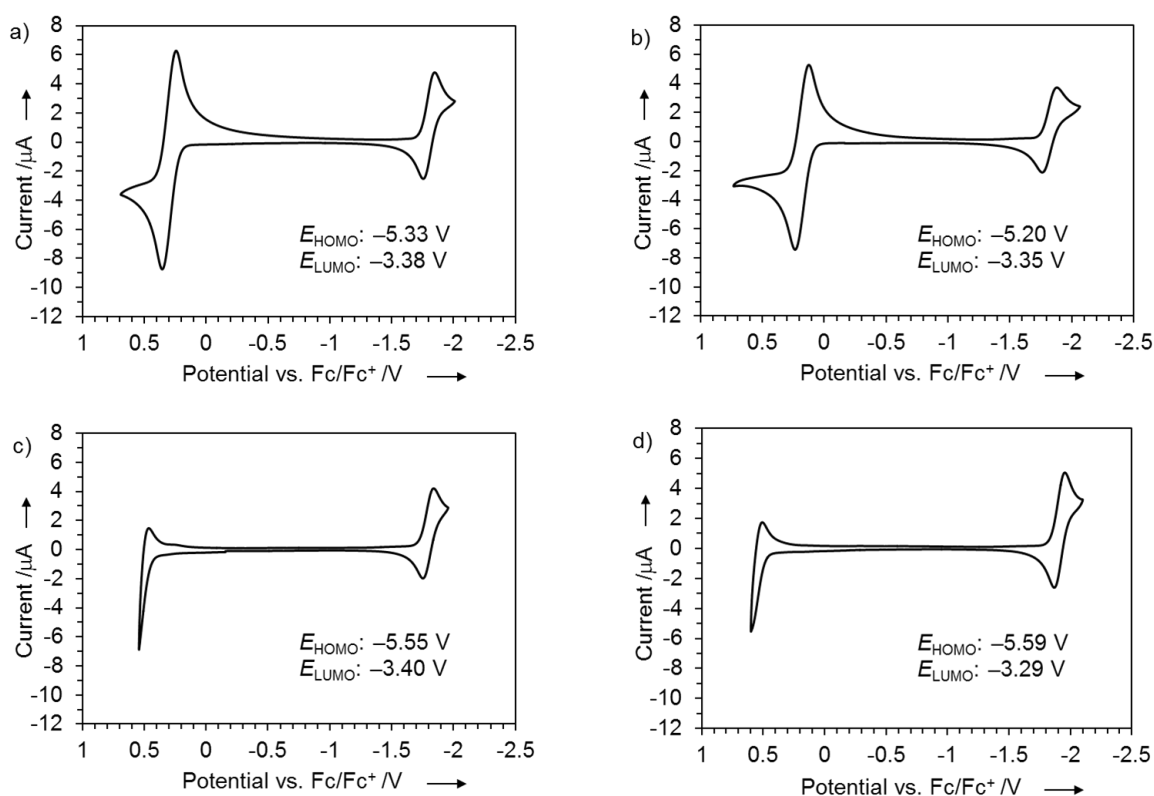

**Figure S19.** Cyclic voltammograms of a) **1**, b) **2**, c) **3**, and d) **4**.

# NMR Charts

$^1\text{H}$  NMR: (400 MHz,  $\text{CDCl}_3$ )

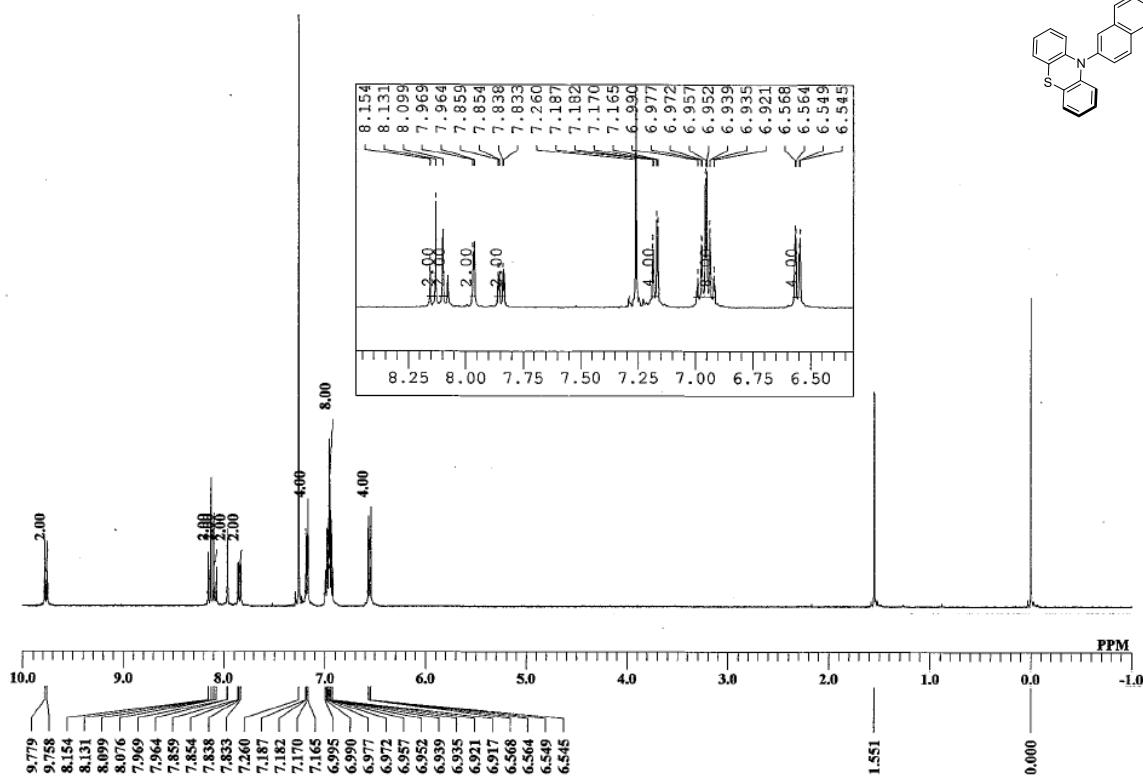

$^{13}\text{C}$  NMR: (100 MHz,  $\text{CDCl}_3$ )

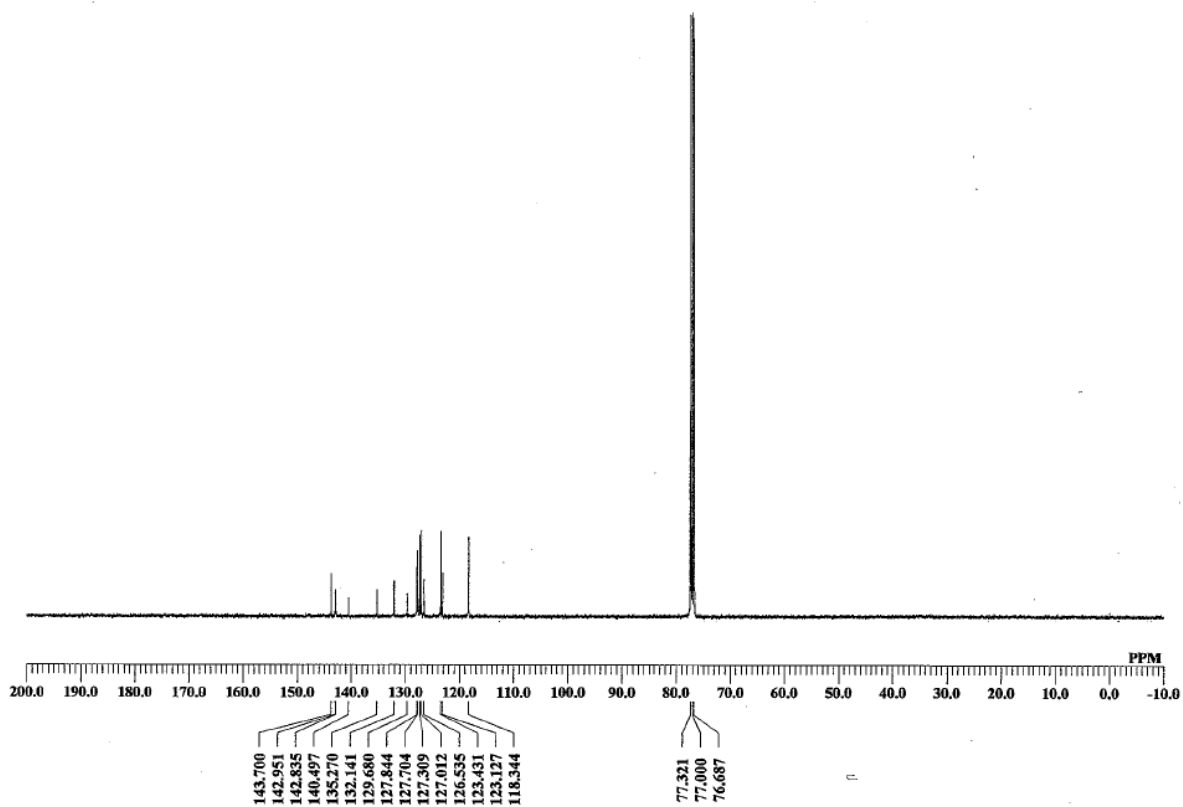



$^1\text{H}$  NMR: (400 MHz,  $\text{CDCl}_3$ )

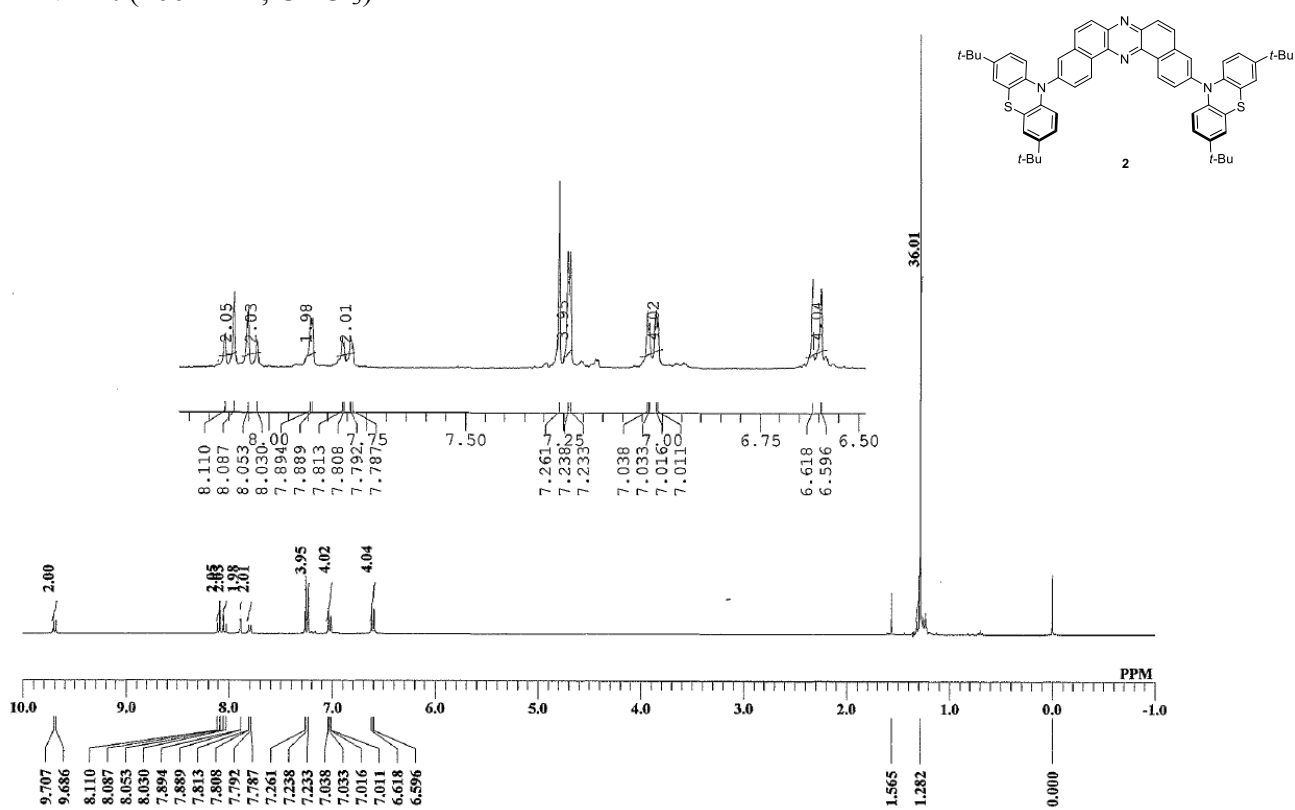

$^{13}\text{C}$  NMR: (100 MHz,  $\text{CDCl}_3$ )

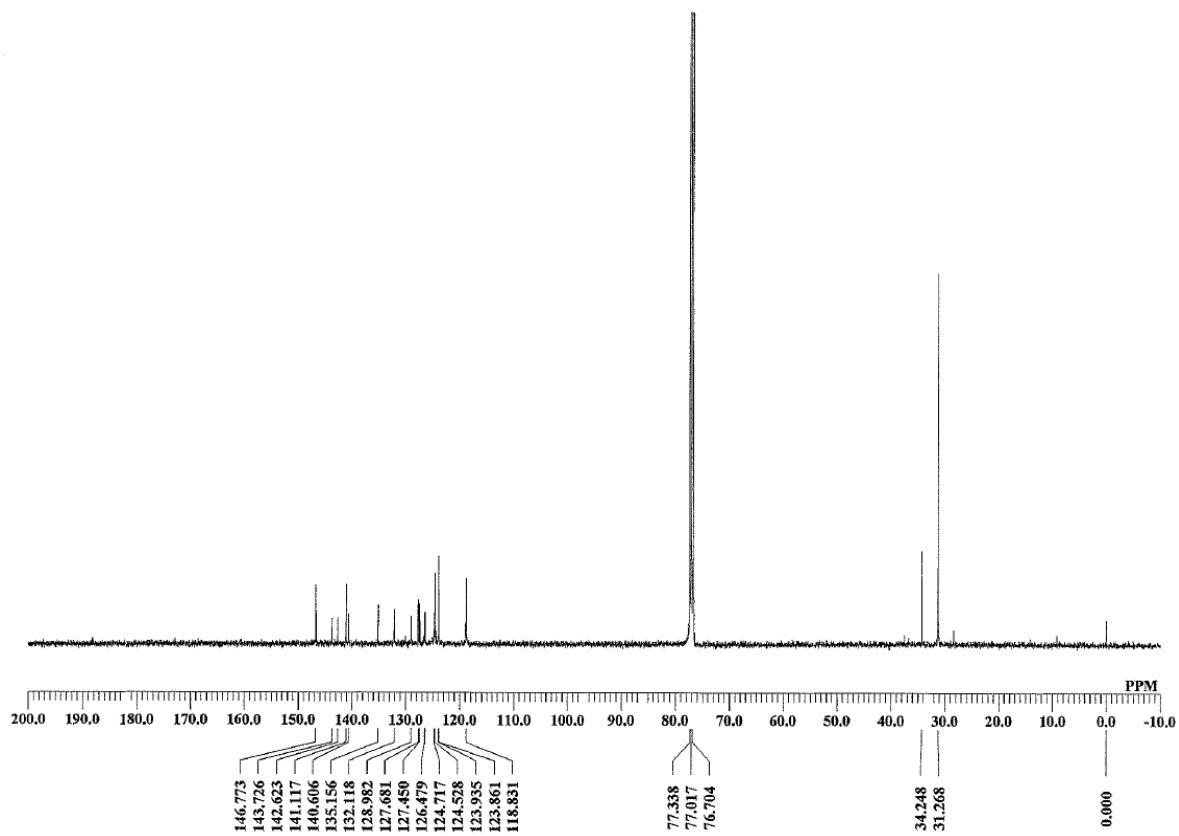

$^1\text{H}$  NMR: (400 MHz,  $\text{CDCl}_3$ )

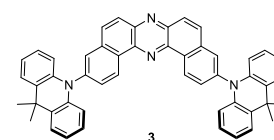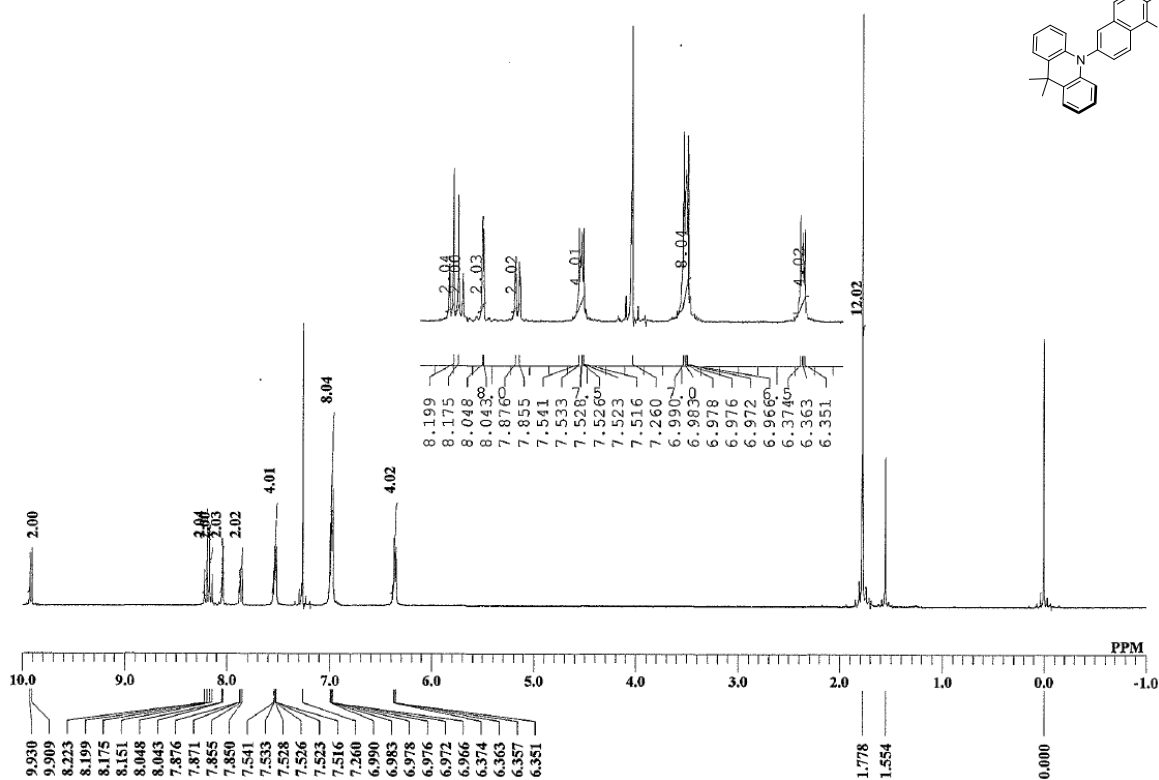

$^{13}\text{C}$  NMR: (100 MHz,  $\text{CDCl}_3$ )

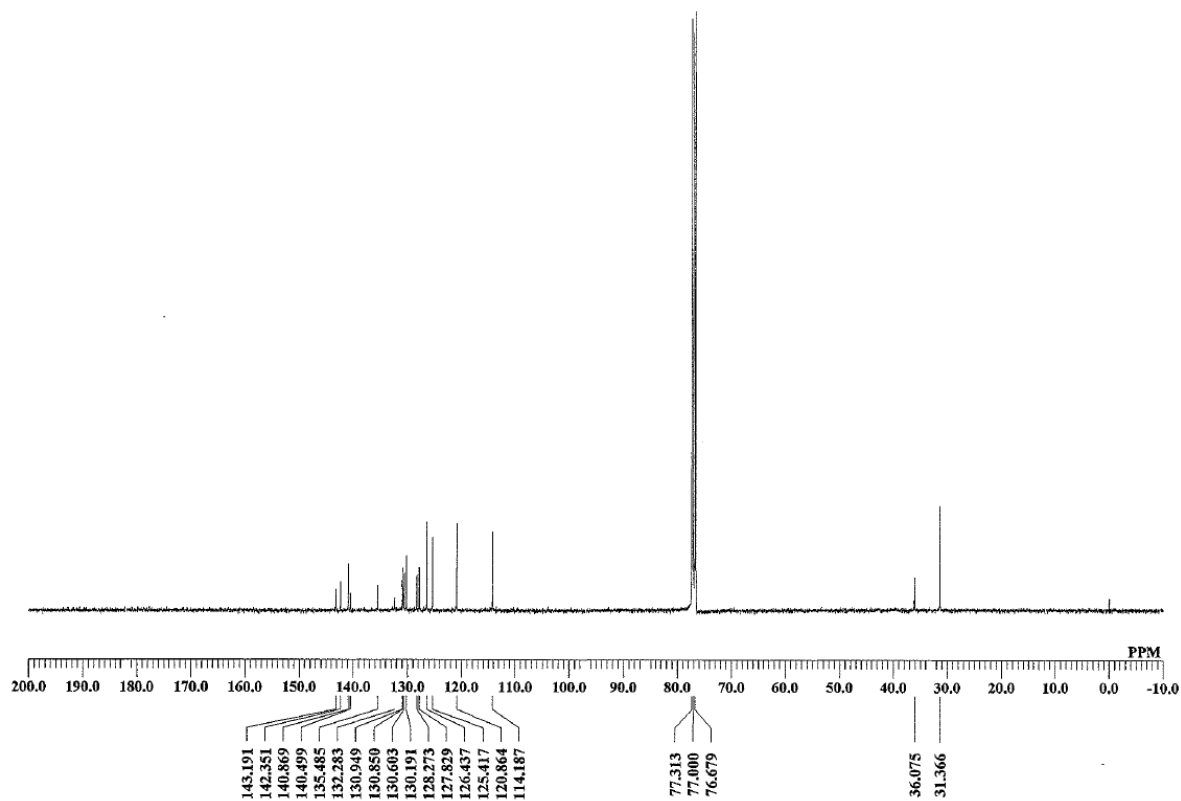

$^1\text{H}$  NMR: (400 MHz,  $\text{CDCl}_3$ )

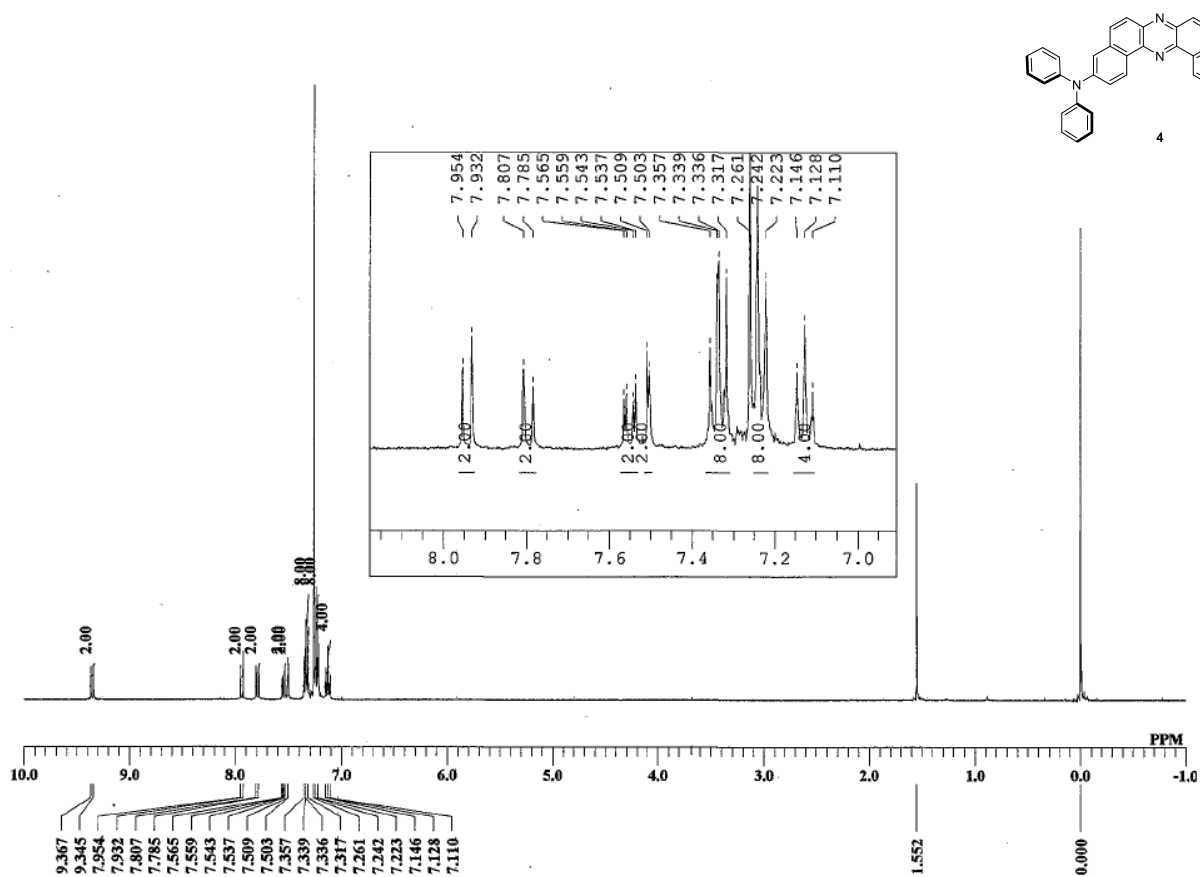

$^{13}\text{C}$  NMR: (100 MHz,  $\text{CDCl}_3$ )

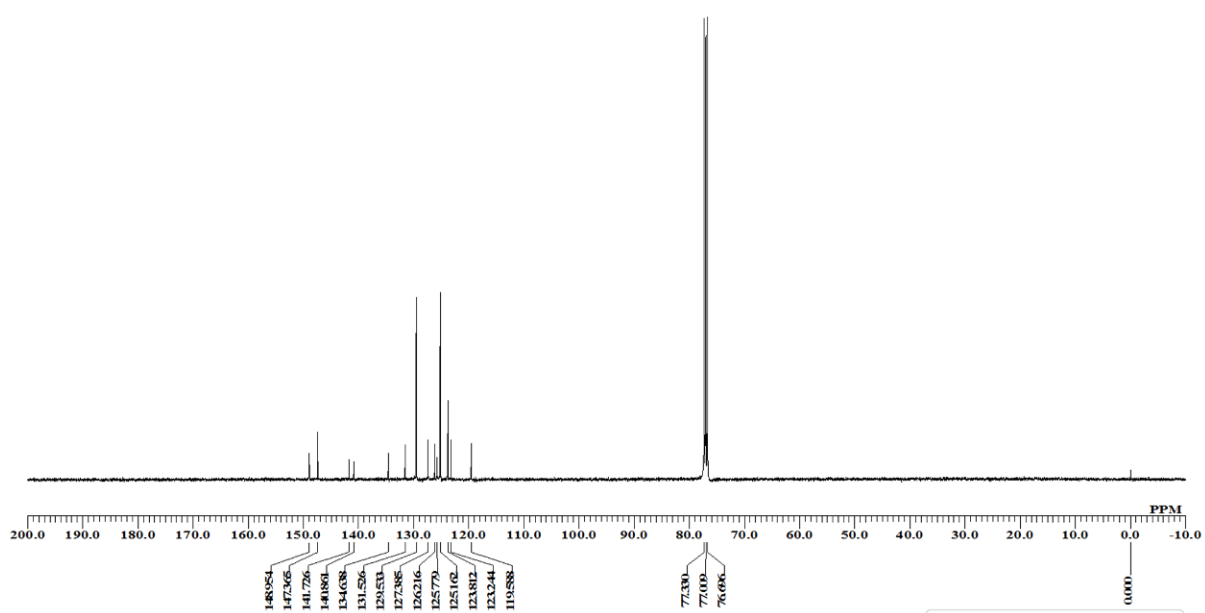

## References

- (S1) Yan, P.; Millard, A. C.; Wei, M.; Loew, L. M. *J. Am. Chem. Soc.* **2006**, *128*, 11030–11031.
- (S2) Vilches-Herrera, M.; Miranda-Sepúlveda, J.; Rebolledo-Fuentes, M.; Fierro, A.; Lühr, S.; Iturriaga-Vasquez, P.; Cassels, B. K.; Reyes-Parada, M.; *Bioorg. Med. Chem.* **2009**, *17*, 2452–2460.
- (S3) Kormos, A.; Móczár, I.; Sveiczter, A.; Baranyai, P.; Párkányi, L.; Tóth, K.; Huszthy, P. *Tetrahedron* **2012**, *68*, 7063–7069.
- (S4) Andrew, T. L.; Swager, T. M. *J. Org. Chem.* **2011**, *76*, 2976–2993.
- (S5) Takeda, Y.; Okazaki, M.; Minakata, S. *Chem. Commun.* **2014**, *50*, 10291–10294.
- (S6) Ono, K.; Joho, M.; Saito, K.; Tomura, M.; Matsushita, Y.; Naka, S.; Okada, H.; Onnagawa, H. *Eur. J. Inorg. Chem.* **2006**, 3676–3683.
- (S7) Altomare, A.; Cascarano, G.; Giacovazzo, C.; Guagliardi, A.; Burla, M.; Polidori, G.; Camalli, M. *J. Appl. Cryst.* **1994**, *27*, 435–436.
- (S8) Gaussian 09, Revision A.02, Frisch, M. J.; Trucks, G. W.; Schlegel, H. B.; Scuseria, G. E.; Robb, M. A.; Cheeseman, J. R.; Scalmani, G.; Barone, V.; Mennucci, B.; Petersson, G. A.; Nakatsuji, H.; Caricato, M.; Li, X.; Hratchian, H. P.; Izmaylov, A. F.; Bloino, J.; Zheng, G.; Sonnenberg, J. L.; Hada, M.; Ehara, M.; Toyota, K.; Fukuda, R.; Hasegawa, J.; Ishida, M.; Nakajima, T.; Honda, Y.; Kitao, O.; Nakai, H.; Vreven, T.; Montgomery Jr., J. A.; Peralta, J. E.; Ogliaro, F.; Bearpark, M.; Heyd, J. J.; Brothers, E.; Kudin, K. N.; Staroverov, V. N.; Kobayashi, R.; Normand, J.; Raghavachari, K.; Rendell, A.; Burant, J. C.; Iyengar, S. S.; Tomasi, J.; Cossi, M.; Rega, N.; Millam, J. M.; Klene, M.; Knox, J. E.; Cross, J. B.; Bakken, V.; Adamo, C.; Jaramillo, J.; Gomperts, R.; Stratmann, R. E.; Yazyev, O.; Austin, A. J.; Cammi, R.; Pomelli, C.; Ochterski, J. W.; Martin, R. L.; Morokuma, K.; Zakrzewski, V. G.; Voth, G. A.; Salvador, P.; Dannenberg, J. J.; Dapprich, S.; Daniels, A. D.; Farkas, O.; Foresman, J. B.; Ortiz, J. V.; Cioslowski, J.; Fox, D. J. Gaussian, Inc., Wallingford CT, 2009.
- (S9) Rybakiewicz, R.; Gawrys, P.; Tsikritzis, D.; Emmanouil, K.; Kennou, S.; Zagorska, M.; Pron, A. *Electrochim. Acta* **2013**, *96*, 13–17.
- (S10) Trasatti, S. *Pure Appl. Chem.* **1986**, *58*, 955–966.
- (S11) Data, P.; Motyka, R.; Lapkowski, M.; Suwinski, J.; Monkman, A. P. *J. Phys. Chem. C* **2015**, *119*, 20188–20200.
- (S12) Bredas, J.-L. *Mater. Horiz.* **2014**, *1*, 17–19.
